# 1 **Large-Scale Uniform Analysis of Cancer Whole Genomes in Multiple** 2 **Computing Environments**

3  
4 Christina K. Yung<sup>1,\*</sup>, Brian D. O'Connor<sup>1,2,\*</sup>, Sergei Yakneen<sup>1,3,\*</sup>, Junjun Zhang<sup>1,\*</sup>, Kyle Ellrott<sup>4</sup>,  
5 Kortine Kleinheinz<sup>5,6</sup>, Naoki Miyoshi<sup>7</sup>, Keiran M. Raine<sup>8</sup>, Romina Royo<sup>9</sup>, Gordon B. Saksena<sup>10</sup>,  
6 Matthias Schlesner<sup>5</sup>, Solomon I. Shorser<sup>1</sup>, Miguel Vazquez<sup>11</sup>, Joachim Weischenfeldt<sup>3,12</sup>, Denis  
7 Yuen<sup>1</sup>, Adam P. Butler<sup>8</sup>, Brandi N. Davis-Dusenbery<sup>13</sup>, Roland Eils<sup>14,6</sup>, Vincent Ferretti<sup>1</sup>, Robert L.  
8 Grossman<sup>15</sup>, Olivier Harismendy<sup>16,17</sup>, Youngwook Kim<sup>18</sup>, Hidewaki Nakagawa<sup>19</sup>, Steven J.  
9 Newhouse<sup>20</sup>, David Torrents<sup>9,21</sup>, Lincoln D. Stein<sup>1,22,‡</sup> on behalf of the PCAWG Technical Working  
10 Group<sup>23</sup> and the PCAWG Network

11  
12 \* *These authors contributed equally to this work.*

13 ‡ *Corresponding author: [lincoln.stein@gmail.com](mailto:lincoln.stein@gmail.com)*

14  
15 <sup>1</sup>Informatics and Biocomputing Program, Ontario Institute for Cancer Research, Toronto, Ontario, M5G 0A3, Canada.  
16 <sup>2</sup>UC Santa Cruz Genomics Institute, University of California Santa Cruz, Santa Cruz, California, 95065, USA.  
17 <sup>3</sup>Genome Biology Unit, European Molecular Biology Laboratory, Heidelberg, Baden-Württemberg, 69120, Germany.  
18 <sup>4</sup>Department of Computational Biology, Oregon Health and Science University, Portland, Oregon, 97239, USA.  
19 <sup>5</sup>Division of Theoretical Bioinformatics, German Cancer Research Center (DKFZ), Heidelberg, Baden-Württemberg,  
20 69120, Germany. <sup>6</sup>Department for Bioinformatics and Functional Genomics, Institute for Pharmacy and Molecular  
21 Biotechnology and BioQuant, Heidelberg University, Heidelberg, Baden-Württemberg, 69120, Germany. <sup>7</sup>Human  
22 Genome Center, Institute of Medical Science, University of Tokyo, Tokyo, 108-8639, Japan. <sup>8</sup>Cancer Ageing and  
23 Somatic Mutation Programme, Wellcome Trust Sanger Institute, Hinxton, Cambridgeshire, CB10 1SA, United  
24 Kingdom. <sup>9</sup>Department of Life Sciences, Barcelona Supercomputing Center, Barcelona, Catalunya, 8034, Spain.  
25 <sup>10</sup>Cancer Program, Broad Institute of MIT and Harvard, Cambridge, Massachusetts, 02142, USA. <sup>11</sup>Structural  
26 Computational Biology Group, Centro Nacional de Investigaciones Oncológicas, Madrid, Madrid, 28029, Spain.  
27 <sup>12</sup>BRIC/Finsen Laboratory, Rigshospitalet, Copenhagen, 2200, Denmark. <sup>13</sup>Seven Bridges, Cambridge,  
28 Massachusetts, 02142, USA. <sup>14</sup>Theoretical Bioinformatics, German Cancer Research Center (DKFZ), Heidelberg,  
29 Baden-Württemberg, 69120, Germany. <sup>15</sup>Center for Data Intensive Science, University of Chicago, Chicago, Illinois,  
30 60637, USA. <sup>16</sup>Department of Medicine, University of California San Diego, San Diego, California, 92093, USA.  
31 <sup>17</sup>Moore's Cancer Center, Department of Medicine, Division of Biomedical Informatics, University of California San  
32 Diego, San Diego, California, 92093, USA. <sup>18</sup>Samsung Advanced Institute of Health Science and Technology,  
33 Sungkyunkwan University, School of Medicine, Seoul, 135-710, South Korea. <sup>19</sup>Laboratory for Genome Sequencing  
34 Analysis, RIKEN Center for Integrative Medical Sciences, Tokyo, 108-8639, Japan. <sup>20</sup>Technical Services Cluster,  
35 European Molecular Biology Laboratory, European Bioinformatics Institute, Hinxton, Cambridge, CB10 1SD, United  
36 Kingdom. <sup>21</sup>Institució Catalana de Recerca i Estudis Avançats, Barcelona, Catalunya, 8010, Spain. <sup>22</sup>Department of  
37 Molecular Genetics, University of Toronto, Toronto, Ontario, M5S 1A1, Canada. <sup>23</sup>Full lists of members and  
38 affiliations appear at the end of the paper.

39

## 40 **Abstract**

41 The International Cancer Genome Consortium (ICGC)'s Pan-Cancer Analysis of Whole Genomes  
42 (PCAWG) project aimed to categorize somatic and germline variations in both coding and non-  
43 coding regions in over 2,800 cancer patients. To provide this dataset to the research working  
44 groups for downstream analysis, the PCAWG Technical Working Group marshalled ~800TB of  
45 sequencing data from distributed geographical locations; developed portable software for uniform  
46 alignment, variant calling, artifact filtering and variant merging; performed the analysis in a  
47 geographically and technologically disparate collection of compute environments; and  
48 disseminated high-quality validated consensus variants to the working groups. The PCAWG  
49 dataset has been mirrored to multiple repositories and can be located using the ICGC Data Portal.  
50 The PCAWG workflows are also available as Docker images through Dockstore enabling  
51 researchers to replicate our analysis on their own data.

## 52 **Introduction**

53 The International Cancer Genome Consortium (ICGC)/The Cancer Genome Atlas (TCGA) Pan-  
54 Cancer Analysis of Whole Genomes (PCAWG) study has characterized the pattern of mutations  
55 in over 2,800 cancer whole genomes. Extending TCGA Pan-Cancer analysis project, which  
56 focused on molecular aberrations in protein coding regions only<sup>1</sup>, PCAWG undertook the study of  
57 whole genomes, allowing for the discovery of driver mutations in cis-regulatory sites and non-  
58 coding RNAs, examination of the patterns of large-scale structural rearrangements, identification  
59 of signatures of exposure, and elucidation of interactions between somatic mutations and germline  
60 polymorphisms.

61 The PCAWG dataset comprises a total of 5,789 whole genomes of tumors and matched normal  
62 tissue spanning 39 tumor types. The tumor/normal pairs came from a total of 2,834 donors

63 collected and sequenced by 48 sequencing projects across 14 jurisdictions (Supplementary Fig. 1).  
64 In addition, RNA-Seq profiles were obtained from a subset of 1,284 of the donors<sup>2</sup>. While the  
65 individual sequencing projects contributing to PCAWG had previously identified genomic variants  
66 within their individual cancer cohorts, each project had used their own preferred methods for read  
67 alignment, variant calling and artifact filtering. During initial evaluation of the data set, we found  
68 that the different analysis pipelines contributed high levels of technical variation, hindering  
69 comparisons across multiple cancer types<sup>3</sup>. To eliminate the variations arising from non-uniform  
70 analysis, we reanalyzed all samples starting with the raw sequencing reads and using a  
71 standardized set of alignment, variant calling and filtering methods. These “core” workflows  
72 yielded uniformly analyzed genomic variants for downstream analyses by various PCAWG  
73 working groups. A subset of these variants were validated through targeted deep sequencing to  
74 estimate the accuracy of our approach<sup>4</sup>.

75 To create this uniform analysis set, multiple logistic and technical challenges had to be overcome.  
76 First, projects participating in the PCAWG study employed their own metadata conventions for  
77 describing their raw sequencing data sets. Hence, we had to establish a PCAWG metadata standard  
78 suitable for all the participating projects. Second, and more significantly, the data was large in size  
79 -- 800TB of raw sequencing reads -- and distributed geographically across the world. During  
80 realignment, the data transiently doubled in size, and after final variant calling and other  
81 downstream analysis, the full data set reached nearly 1PB. Furthermore, the compute necessary to  
82 fully harmonize the data was estimated at more than 30 million core-hours. Both the storage and  
83 compute requirements made it impractical to complete the analysis at any single research institute.  
84 In addition, legal constraints across the various jurisdictions imposed restrictions as to where  
85 personal data could be stored, analyzed and redistributed<sup>5</sup>. Hence, we needed a protocol to spread

86 the compute and storage resources across multiple commercial and academic compute centers.  
87 This requirement, in turn, necessitated the development of analysis pipelines that would be  
88 portable to different compute environments and yield consistent analysis results independent of  
89 platform. With multiple analysis pipelines running simultaneously in multiple compute  
90 environments, the assignment of workload, tracking of progress, quality checking of data and  
91 dissemination of results all required sophisticated and flexible planning.

92 Our approach to tackling these challenges was unique and substantially different from previous  
93 large-scale genome analysis endeavors. First, as a collaborative effort among a wide range of  
94 institutions not backed by a centralized funding source, a high degree of coordination among a  
95 large task force of volunteer software engineers, bioinformaticians and computer scientists was  
96 required. Second, the project fully embraced the use of both public and private cloud compute  
97 technologies while leveraging established high-performance computing (HPC) infrastructures to  
98 fully utilize the compute resources contributed by the partner organizations. The cloud technology  
99 platforms we utilized included both Infrastructure as a Service (IaaS): OpenStack, Amazon Web  
100 Services and Microsoft Azure; and Platform as a Service (PaaS): Seven Bridges (SB). Lastly, the  
101 project made heavy use of Docker, a new lightweight virtualization technology that ensured  
102 workflows, tools and infrastructure would work identically across the large number of compute  
103 environments utilized by the project.

104 Utilizing the compute capacity contributed by academic HPC, academic clouds and commercial  
105 clouds (Table 1), we were able to complete a uniform analysis of the entire set of 5,789 whole  
106 genomes in just over 23 months (Figure 1). Figure 3 illustrates the three broad phases of the project:  
107 (1) Marshalling and upload of the data into data analysis centres (3 months); (2) Alignment and  
108 variant calling (18 months); and (3) Quality filtering, merging, synchronization and distribution of

109 the variant calls to downstream research groups (2 months). A fourth phase of the project, in which  
110 PCAWG working groups used the uniform variant calls for downstream analysis, such as cancer  
111 driver discovery, began in the summer of 2016 and continued through the first two quarters of  
112 2017.

113 The following sections will describe the technical solutions used to accomplish each of the phases  
114 of the project.

### 115 **Phase 1: Data Marshalling and Upload**

116 A significant challenge for the project was that at its inception, a large portion of the raw read  
117 sequencing data had yet to be submitted to a read archive and thus had no standard retrieval  
118 mechanism. In addition, the metadata standards for describing the raw data varied considerably  
119 from project to project. For this reason, we asked the participating projects to prepare and upload  
120 the 774 TB of raw whole genome sequencing (WGS) data and 27 TB raw RNA-seq data into a  
121 series of geographically distributed data repositories, each running a uniform system for registering  
122 the data set, accepting and validating the raw read data and standardized metadata.

123 We utilized seven geographically distributed data repositories located at: (1) Barcelona  
124 Supercomputing Centre (BSC), (2) European Bioinformatics Institute (EMBL-EBI) in the UK, (3)  
125 German Cancer Research Center (DKFZ) in Germany; (4) the University of Tokyo in Japan; (5)  
126 Electronics and Telecommunications Research Institute (ETRI) in South Korea; (6) the Cancer  
127 Genome Hub (CGHub) and (7) the Bionimbus Protected Data Cloud (PDC) in the USA (Figure 2  
128 and Suppl Table 1).

129 To accept and validate sequence set uploads, each data repository ran a commercial software  
130 system, GNOS (Annai Systems). We chose GNOS because of the heavy testing it had previously

131 received as the engine powering TCGA CGHub, and its support for validation of metadata  
132 according to the Sequence Read Archive (SRA) standard and file submission, strong user  
133 authentication and encryption, as well as its highly optimized data transfer protocol<sup>6</sup>. Each of the  
134 seven data centers initially allocated several hundred terabytes of storage to accept raw sequencing  
135 data from submitters within the region. The data centers also provided co-located compute  
136 resources to perform alignment and variant calling on the uploaded data.

137 Genomic data uploaded to the GNOS repositories was accompanied with detailed and accurate  
138 metadata to describe the cancer type, sample type, sequencing type and other attributes for  
139 managing and searching the files. We required that identifiers for project, donor, sample follow a  
140 standardized convention such that validation and auditing tools could be implemented. Most of the  
141 naming conventions in PCAWG were adopted from the well established ICGC data dictionary  
142 (<http://docs.icgc.org/dictionary/about/>).

143 Since most member projects at the time of upload already had sequencing reads aligned and  
144 annotated using their own metadata standards, a non-trivial effort was required to prepare the  
145 sequencing data for submission to GNOS. Each member project had to (1) prepare lane-level  
146 unaligned reads in BAM format, (2) reheader the BAM files with metadata following the PCAWG  
147 conventions, (3) generate metadata XML files, and (4) upload the BAM files along with the  
148 metadata XML files to GNOS. To facilitate this process, we developed the *PCAP-core* tool  
149 (<https://github.com/ICGC-TCGA-PanCancer/PCAP-core>) to extract the metadata from the BAM  
150 headers, validate the metadata, transform the metadata into the XML files conforming to the SRA  
151 specifications, and submitting the BAM files along with the metadata XML files to GNOS.

152

## 153 **Phase 2: Sequence Alignment and Variant Calling**

154 We began the process of sequence alignment about two months after the uploading process had  
155 begun. Both tumor and matched normal reads were subjected to uniform sequence alignment using  
156 BWA-MEM<sup>7</sup> on top of a common GRCh37-based reference genome that was enhanced with decoy  
157 sequences, viral sequences, and the revised Cambridge reference genome for the mitochondria.

158 Efforts by the project QC group demonstrated that employing multiple variant callers in ensemble  
159 fashion improved calling sensitivity<sup>3</sup>, thus the aligned tumor/normal pairs were subjected to  
160 somatic variant calling using three “best practice” software pipelines. These pipelines were  
161 developed by the Sanger Institute<sup>8-11</sup>; jointly by DKFZ<sup>12</sup> and the European Molecular Biology  
162 Laboratory (EMBL)<sup>13</sup>; and the Broad Institute<sup>14</sup> with contribution from MD Anderson Cancer  
163 Center-Baylor College of Medicine<sup>15</sup>. Each pipeline represents the best practices from the  
164 authoring organizations and include the current versions of each institute’s flagship tools. Each  
165 pipeline consists of multiple software tools for calling of single and multiple nucleotide variants  
166 (SNVs and MNVs), small insertions/deletions (indels), structural variants (SVs) and somatic copy  
167 number alterations (SCNAs). The minimum compute requirements, median runtime and the  
168 analytical algorithms for each pipeline are shown in Table 2.

169 When possible, both the alignment and variant calling pipelines were executed in the same regional  
170 compute centers to which the data sets were uploaded. As the project progressed, we utilized  
171 additional compute resources from AWS, Azure, iDASH, the Ontario Institute for Cancer  
172 Research (OICR), the Sanger Institute, and Seven Bridges (Figure 2). These centers computed on  
173 data sets located in the same region to optimize data transfer. Over the course of the project, some  
174 centers outpaced others and we rebalanced data sets as needed to use resources as efficiently as

175 possible. Figure 1 shows the progress of the analytic pipelines with more details shown in  
176 Supplementary Figures 2-6.

### 177 **Phase 3: Variant merging, filtering, and synchronization**

178 Following the completion of the three variant calling workflows, variants were passed to an  
179 additional pipeline referred as the “OxoG workflow”. This pipeline filtered out oxidative artifacts  
180 in SNVs using the OxoG algorithm<sup>16</sup>, normalized indels using the bcftools “norm” function,  
181 annotated genomic features for downstream merging of variants, and generated one “minibam”  
182 per specimen using the VariantBam algorithm<sup>17</sup>. Minibams are a novel format for representing the  
183 evidence that underlies genomic variant calls. Read pairs spanning a variant within a specified  
184 window were extracted from the whole genome BAM to generate the minibam. The windows we  
185 chose were +/- 10 base pairs (bp) for SNVs, +/- 200 bp for indels, and +/- 500 bp for SV  
186 breakpoints. The resulting minibams are about 0.5% of the size of whole genome BAMs, totalling  
187 to about four terabytes for all PCAWG specimens, making it much easier to download and store  
188 for the purpose of inspecting variants and their underlying read evidence.

189 Following filtering, we applied a series of merge algorithms to merge variants from the multiple  
190 variant calling pipelines into consensus call sets with higher accuracies than the individual  
191 pipelines alone. The SNV and indel merge algorithms were developed on the basis of experimental  
192 validation of the individual variant calling pipelines using deep targeted sequencing, a process  
193 detailed in the PCAWG-1 marker paper<sup>4</sup>. The algorithm for consensus SVs is described in the  
194 PCAWG-6 marker paper<sup>18</sup>. The consensus SCNAs were built upon the base-pair breakpoint  
195 results from the consensus SVs using a multi-tiered bespoke approach combining results from 6  
196 SCNA algorithms<sup>19</sup>.



197 Following merging, the SNV, indel, SV and SCNA consensus call sets were subjected to intensive  
198 examination by multiple groups in order to identify anomalies and artefacts, including uneven  
199 coverage of the genome, strand and orientation bias, contamination with reads from non-human  
200 species, contamination of the library with DNA from an unrelated donor, and high rates of common  
201 germline polymorphisms among the somatic variant calls<sup>4,11</sup>. In keeping with our mission to  
202 provide a high-quality and uniformly annotated data set, we developed a series of filters to annotate  
203 and/or remove these artefacts. Tumor variant call sets that were deemed too problematic to use for  
204 downstream analysis were placed on an “exclusion list” (353 specimens, 176 donors). In addition,  
205 we established a “grey list” (150 specimens, 75 donors), of call sets that had failed some tests but  
206 not others and could be used, with caution, for certain types of downstream analysis. The criteria  
207 for classifying callsets into exclusion and grey list are described in more detail in the PCAWG-1  
208 paper<sup>10</sup>.

209 Following the filtering steps, we used GNOS to synchronize the aligned reads and variant call sets  
210 among a small number of download sites for use by PCAWG downstream analysis working groups  
211 (Suppl Table 2). We also provided login credentials to members of PCAWG working groups for  
212 compute cloud-based access to the aligned read data across several of the regional data analysis  
213 centers, which avoided the overhead of downloading the data.

## 214 **Software and Protocols**

215 This section describes the software and protocols developed for this project in more detail. All the  
216 software that we created for this project is available for use by any research group to conduct  
217 similar cloud-based cancer genome analyses economically and at scale.

218

## 219 Centralized Metadata Management System

220 The metadata describing the donors, specimens, raw sequencing reads, WGS and RNA-Seq  
221 alignments, variant calls from the three pipelines, OxoG-filtered variants, and mini-BAMs were  
222 collected from globally distributed GNOS repositories, consolidated and indexed nightly using  
223 ElasticSearch (<https://www.elastic.co>) in a specially designed object graph model. This centrally  
224 managed metadata index was a key component of our operations and data provenance tracking.  
225 First, the metadata index was critical for tracking the status of each sequencing read set and for  
226 scheduling the next analytic step. The index also tracked the current location of each BAM and  
227 variant call set, allowing the pipelines to access the needed input data efficiently. Second, the  
228 metadata index provided the basis for a dashboard (<http://pancancer.info>) for all stakeholders to  
229 track day-to-day progress of each pipeline at each compute site. By reviewing the throughput of  
230 each compute site on a daily basis, we were able to identify issues early and to assign work  
231 accordingly to keep our compute resources productive. Third, the metadata index was also used  
232 by the ICGC Data Coordination Centre (DCC) to transfer PCAWG core datasets to long-term  
233 genomic data archive systems. Finally, the metadata index was imported into the ICGC Data Portal  
234 (<https://dcc.icgc.org>) to create a faceted search for PCAWG data allowing users to quickly locate  
235 data based on queries about the donor, cancer type, data type or data repositories.

## 236 Docker Containers & Consonance

237 Given that the compute resources donated to the PCAWG project were a mix of cloud and HPC  
238 environments, we required a mechanism to encapsulate the analytical workflows to allow them to  
239 run smoothly across a wide variety of compute sites. The approaches we used evolved over time  
240 to incorporate better ways of abstracting and packaging tools to facilitate this portability. Initially,  
241 we used SeqWare workflow execution engine<sup>20</sup> for bundling software and executing workflows,

242 but this system required extensive and time consuming setup for the worker virtual machines  
243 (VMs). Later, we adopted Docker (<http://www.docker.com>) as a key enabling technology for  
244 running workflows in an infrastructure-independent manner. As a lightweight, infrastructure-  
245 agnostic containerization technology, Docker allowed PCAWG pipeline authors to fully  
246 encapsulate tools and system dependencies into a portable image. This included the fleet of VMs  
247 on commercial and academic clouds, as well as the project's HPC clusters that were modified to  
248 support Docker containers. Each of our major pipelines was encapsulated in a single Docker  
249 image, along with a suitable workflow execution engine, reference data sets, and software libraries  
250 (Table 2) .

251 Another key component of the PCAWG software infrastructure stack was cloud-agnostic  
252 technology to provision virtual machines on both academic and commercial clouds. Our initial  
253 attempts to scale the analytic pipelines across multiple cloud systems were complicated by  
254 transient failures in many of the academic cloud environments, subtle differences between  
255 seemingly identical clouds, and misconfigured services within the clouds. Initially, we attempted  
256 to replicate within the clouds standard components of conventional HPC environments, including  
257 shared file systems and cluster load balancing systems. However, we quickly learned that these  
258 perform poorly in the dynamic environments of the cloud. After several design iterations, we  
259 developed Consonance (<https://github.com/consonance>), a cloud-agnostic provisioning and  
260 queueing platform. For each of the cloud platforms in use in PCAWG, including OpenStack,  
261 VMWare, AWS, and Azure, Consonance provided a queue where work scheduling was decoupled  
262 from the worker nodes. As the fleet of working nodes shrank or expanded, each queue queried the  
263 centralized metadata index to obtain the next batch of tasks to execute. Consonance then created  
264 and maintained a fleet of worker VMs, launched new pipeline jobs, detected and relaunched failed

265 VMs, and reran workflows as needed. Consonance allowed us to dynamically allocate cloud  
266 resources depending on the workload at hand, and even interacted with the AWS spot marketplace  
267 to minimize our commercial cloud costs.

#### 268 The Operations: whitelist, work queue, cloud shepherds

269 For the duration of the project, several personnel were required to operate the Docker images,  
270 Consonance and the metadata index effectively (Figure 4). Each compute environment was  
271 managed by a “cloud shepherd” responsible for completing the workflows on a set of pre-assigned  
272 donors or specimens. All the HPC environments (BSC, DKFZ, UTokyo, UCSC, Sanger) were  
273 shepherded by personnel local to the institute who were already familiar with the specific file  
274 systems and work schedulers, and obtained technical support from their local system  
275 administrators. The majority of the cloud environments (AWS, Azure, DKFZ, EMBL-EBI, ETRI,  
276 OICR, PDC) granted tenancy to OICR whose personnel acted as cloud shepherds. The other clouds  
277 (iDASH, SB), newly launched at the time, assigned their own cloud shepherds who also tested and  
278 fine tuned their environments in the process.

279 A project manager acted as the point of contact for all the cloud shepherds to report any technical  
280 issues and progress, such that the overall availability of compute resources and throughput at any  
281 time point could be estimated. Combining this knowledge with the information from the  
282 centralized metadata index, the project manager assigned donors and workflows to compute  
283 environments in the form of “whitelists” on a weekly basis. Cloud shepherds then added the  
284 whitelist of donors to their workflow queue for execution. This approach allowed us to be agile in  
285 responding to data availability disruptions, planned or unplanned downtime while optimizing data  
286 transfer and operations throughput.

287 While quotas shifted throughout the duration of the analysis, as demands and workloads on the  
288 individual centers changed, the overall peak commitment received was on the order of the 15,000  
289 cores, approximately 60TB of RAM, and a peak usage of ~630 virtual machines.

#### 290 Software Distribution through Dockstore

291 The workflows used during PCAWG production include several PCAWG-specific elements that  
292 may limit their usability by researchers outside of the project. To facilitate the long term usage of  
293 these workflows by a broad range of cancer genomic researchers, we have simplified the tools to  
294 make most workflows standalone (Suppl Table 4). These Docker-packaged workflows have been  
295 extensively tested for their reproducibility and are registered on the Dockstore<sup>21</sup>  
296 (<http://dockstore.org>), a service compliant with Global Alliance for Genomics and Health  
297 (GA4GH) standards to provide computational tools and workflows through Docker and described  
298 with Common Workflow Language<sup>22</sup> (CWL). This enables other researchers to run the workflows  
299 on their own data, extend their utility, and replicate the work we have done in any CWL-compliant  
300 environment. By running the identical PCAWG workflows on their own data, researchers will be  
301 able to make direct comparisons and add to the existing PCAWG dataset.

302 The Docker-packaged BAM alignment and variant calling workflows were tested in different  
303 cloud environments and found to be easy to enact by third parties. Some discrepancies with the  
304 official data were observed and attributed to improvements in the underlying software (Sanger,  
305 Delly) or to the stochastic nature of the software, and deemed to have a low overall impact. Despite  
306 not achieving a completely identical results, the reproducibility of the process is satisfactory,  
307 especially considering that it involves software developed independently by different teams.

308

309 Data Distribution / Data Portal

310 While GNOS was used for the core pipelines, Synapse<sup>23</sup> was used to provide an interface to the  
311 files generated by the working groups and other intermediate results created throughout the project.  
312 Unlike GNOS which is focused on archival storage, Synapse allowed for collective editing in the  
313 form of a wiki, provenance tracking and versioning of results through a web interface as well as  
314 programmatic APIs. While Synapse provided an interface that allowed analyses to be shared  
315 rapidly across the consortia, the controlled access data was stored on a secure SFTP server  
316 provided by the National Cancer Institute (NCI). When the working groups complete their  
317 analysis, the metadata is retained in Synapse while the final version of the results is transferred to  
318 the ICGC Data Portal for archival.

319 In addition to GNOS-based repositories, the PCAWG dataset has been mirrored to multiple  
320 locations: the European Genome-phenome Archive (EGA,  
321 <https://www.ebi.ac.uk/ega/studies/EGAS00001001692>), AWS Simple Storage Service (S3,  
322 <https://dcc.icgc.org/icgc-in-the-cloud/aws>), and the Cancer Genome Collaboratory  
323 (<http://cancercollaboratory.org>). The data holdings at each repository at the time of publication are  
324 summarized in Suppl Table 2. To help researchers locate the PCAWG data, the ICGC Data Portal  
325 (<https://dcc.icgc.org>) provides a faceted search interface to query about donor, cancer type, data  
326 type or data repositories. Users can browse the collection of released PCAWG data and generate  
327 a manifest that facilitates downloading of the selected files.

328 The data repositories hosted at AWS S3 and the Collaboratory are powered by an open source  
329 object-based ICGC Storage System (<https://github.com/icgc-dcc/dcc-storage>) that enables fast,  
330 secure and multi-part downloads of files. Since AWS and the Collaboratory also have compute  
331 power co-located with the PCAWG data, they serve as effective cloud resources for researchers

332 wishing to conduct further analyses on the PCAWG data without having to provision local  
333 compute resources and to download terabytes of data to their local compute environment.

### 334 **Discussion: Replicating PCAWG Analysis on Your Own Data**

335 This project provided us with a rare opportunity to directly compare three categories of compute  
336 environment: traditional HPC, academic compute clouds and commercial clouds. In terms of  
337 stability and first time setup effort, we found that the traditional HPC environment routinely  
338 outperformed academic cloud systems, and often outperformed the commercial clouds. However,  
339 most of the academic cloud systems we worked with had been recently installed and some of the  
340 stability issues resulted from the shake-down period. The major benefit of the commercial clouds  
341 was the ability to scale compute resources up or down as needed, the ease of replicating the setup  
342 in different regions, and the availability of cloud-based data centers in different geographic  
343 regions, which allowed us to minimize data transfer overhead. For groups interested in replicating  
344 PCAWG results, or using the analytic pipelines for their own data, we are comfortable  
345 recommending running the analysis on a commercial cloud.

346 In terms of cost, we have summarized in Figure 5 the costs of computing on AWS and the tradeoff  
347 in accuracy if running a subset of the variant calling pipelines. The cost of aligning one normal  
348 specimen and one tumor specimen, and running three variant calling workflows followed by the  
349 OxoG workflow is about \$100 per donor. This is based on a mean WGS coverage of 30X for  
350 normal specimens, and a bimodal coverage distribution with maxima at 38X and 60X for tumor  
351 specimens<sup>24</sup>. In addition, the hourly rate of the VMs are approximated from the spot instance  
352 pricing we experienced during production runs. With three variant calling workflows, we achieved  
353 an F1 score of 0.92. If one is willing to sacrifice some accuracy in order to reduce costs, then

354 running only one variant calling workflow may be an option. Despite the higher costs, running two  
355 workflows does not result in increased accuracy. Unfortunately, we were not able to directly  
356 compare the analysis costs among commercial clouds, academic clouds and HPC due to the  
357 difficulty in assessing the fully loaded cost of provisioning and running an academic compute  
358 cluster.

359 In terms of time, the major benefit of operating on commercial clouds is the availability of ample  
360 resources for simultaneous parallel runs. For example, in a scenario to analyze a total of 100  
361 donors, one runs 200 VMs each aligning one tumor or normal specimen, followed by 300 VMs  
362 each running one of the three variant calling workflows on one donor, and 100 VMs to run OxoG  
363 workflow, the analysis will in principle take under 9 days to complete. In practice, additional time  
364 must be allowed for testing, scaling up, and the inevitability of failed jobs. A more realistic  
365 estimate of the time taken to run 100 donors through the complete PCAWG analysis on a  
366 commercial cloud is a few weeks.

367 Another issue when planning a large-scale genome analysis project is the variance in execution  
368 time from donor to donor. The variant calling pipelines took between 40 and 65 hours of wall time  
369 to complete a tumor/genome pair, with the EMBL/DKFZ pipeline running the quickest and the  
370 Broad and Sanger pipelines taking somewhat longer. In addition to the variant calling step, the  
371 Broad pipeline was preceded by a GATK co-cleaning process taking an additional 24 hours. For  
372 each pipeline there was significant variation in the runtime taken for each genome, and some  
373 tumor/normal pairs required an excessive amount of time to complete. Because long-running jobs  
374 can have economic and logistic impacts, we investigated the cause of this variation by applying  
375 linear regression to a number of features describing the raw sequencing sets, including coverage,  
376 read quality and mapping scores, number of mismatched end pairs and others (data not shown).



377 We found that a single factor, genomic coverage, explained the variation in wall clock time which  
378 increased roughly linearly with coverage.

379 In conclusion, we tackled the challenge of performing uniform analysis on a large dataset across a  
380 geographically and technologically disparate collection of compute resources by developing  
381 technologies that realized the efficiencies of moving algorithms to the data. This is becoming a  
382 necessity as genomic datasets continue to increase in size and are geographically distributed with  
383 some jurisdictions restricting the geographical storage and computing of specific datasets. Our  
384 approach serves as a model for large scale collaborative efforts that engage many organizations  
385 and spread the computation work around the globe.

386 Our effort resulted in three key deliverables. First and foremost, we produced a high-quality,  
387 validated consensus variant and alignment dataset of 2,834 cancer donors. To date, this is the  
388 largest whole genome cancer dataset analyzed in a consistent and uniform way. The dataset formed  
389 the basis for the research by the PCAWG working groups, and will continue to provide value to  
390 the research community for many years into the future. Second, we produced a series of best-  
391 practice analytical workflows that are portable through the use of Docker and are available on the  
392 Dockstore. These workflows are usable in a multitude of compute environments giving researchers  
393 the ability to replicate our analysis on their own data. Finally, the infrastructure we built to  
394 coordinate analyses between cloud and HPC environments will be helpful for other projects  
395 requiring the same distributed approaches.

### 396 **Acknowledgements**

397 The authors would like to acknowledge the donation of the following compute resources: the  
398 PRACE Research Infrastructure resource MareNostrum3 at Barcelona Supercomputing Center

399 with technical expertise provided by the Red Española de Supercomputación and funding support  
400 by the Spanish Ministry of Health, ISCIII, in the project Instituto Nacional de Bioinformática  
401 (PRB2: PT13/0001/0028); the Cancer Genome Collaboratory, jointly funded by the Natural  
402 Sciences and Engineering Research Council of Canada, the Canadian Institutes of Health  
403 Research, Genome Canada, and the Canada Foundation for Innovation, and with in-kind support  
404 from the Ontario Research Fund of the Ministry of Research, Innovation and Science through the  
405 Discovery Frontiers: Advancing Big Data Science in Genomics Research program (grant no.  
406 RGPGR/448167-2013); the EMBL-EBI Embassy Cloud supported by UK's (BBSRC) Large  
407 Facilities Capital Fund and Cancer Research UK's EMBL-EBI Bioinformatics Resource (grant  
408 no. C32939/A20952); sFTP server provided by the Center for Biomedical Informatics &  
409 Information Technology (CBIIT) at National Cancer Institute; infrastructure at the Ontario  
410 Institute for Cancer Research funded by the Government of Ontario and the Canada Foundation  
411 for Innovation (Project #21039); ETRI's OpenStack supported by Institute for Information &  
412 communications Technology Promotion with funding from the Korea government (MSIP)  
413 (No.B0101-15-0104, The Development of Supercomputing System for the Genome Analysis),  
414 Ministry of Health & Welfare, Republic of Korea (grant no: HI14C0072), Korean national research  
415 foundation (grant no NRF-2017R1A2B2012796, NRF-2016R1D1A1B03934110 ), and generous  
416 support from Wan Choi and Kwang-Sung; 'Shirokane'\_provided by Human Genome Center, the  
417 Institute of Medical Science, the University of Tokyo along with technical assistance from Hitachi,  
418 Ltd.; Microsoft Azure contributed through a grant to the UC Santa Cruz Genomics Institute and  
419 supported by the National Human Genome Research Institute of the National Institutes of Health  
420 (grant no U54HG007990) and NCI ITCR (grant no 1R01CA180778); iDASH HIPAA cloud which

421 is a member of the NIH/NHLBI National Centers for Biomedical Computing (U54HL108460) to  
422 UC San Diego Health Sciences, Department of Biomedical Informatics.

423 In addition, the Broad team was supported by G.G. funds at MGH and Broad Institute. The DKFZ  
424 team was supported by the BMBF-funded Heidelberg Center for Human Bioinformatics (HD-  
425 HuB) within the German Network for Bioinformatics Infrastructure (de.NBI) (#031A537A,  
426 #031A537C) and the BMBF-funded grants ICGC PedBrain (01KU1201A, 01KU1201B), ICGC  
427 EOPC (01KU1001A), ICGC MMML-seq (01KU1002B), and ICGC DE-MINING (01KU1505E).  
428 Variant calling with the DKFZ/EMBL pipeline made use of the Roddy framework, and provision  
429 of data and metadata of the German ICGC projects was assisted by the One Touch Pipeline (OTP).  
430 The OICR team was funded by the Government of Ontario and the Canada Foundation for  
431 Innovation (Project #21039). The Sanger team was supported by the Wellcome Trust grant  
432 (098051) with contributions by Shriram G Bhosle, David R Jones, Andrew Menzies, Lucy  
433 Stebbings, Jon W Teague.

434

## 435 **References**

- 436 1. Network, T.C.G.A.R. *et al.* The Cancer Genome Atlas Pan-Cancer analysis project. *Nature*  
437 *Genetics* **45**, 1113-1120 (2013).
- 438 2. PCAWG-3. Pan-Cancer Study of Recurrent and Heterogeneous RNA Aberrations and  
439 Association with Whole-Genome Variants. (in preparation).
- 440 3. Alioto, T.S. *et al.* A comprehensive assessment of somatic mutation detection in cancer  
441 using whole-genome sequencing. *Nat Commun* **6**, 10001 (2015).
- 442 4. PCAWG-1. Consistent Detection of Short Somatic Mutations in 2,778 Cancer Whole  
443 Genomes. (in preparation).

- 444 5. Phillips, M. & Knoppers, B. Building an International Code of Conduct for Genomic Cloud  
445 Research. (in preparation).
- 446 6. Wilks, C. *et al.* The Cancer Genomics Hub (CGHub): overcoming cancer through the  
447 power of torrential data. *Database (Oxford)* **2014**(2014).
- 448 7. Li, H. Aligning sequence reads, clone sequences and assembly contigs with BWA-MEM.  
449 (2013).
- 450 8. Jones, D. *et al.* cgpCaVEManWrapper: Simple Execution of CaVEMan in Order to Detect  
451 Somatic Single Nucleotide Variants in NGS Data. *Curr Protoc Bioinformatics* **56**, 15.10.1-  
452 15.10.18 (2016).
- 453 9. Raine, K.M. *et al.* cgpPindel: Identifying Somatically Acquired Insertion and Deletion  
454 Events from Paired End Sequencing. *Curr Protoc Bioinformatics* **52**, 15.7.1-12 (2015).
- 455 10. Raine, K.M. *et al.* ascatNgs: Identifying Somatically Acquired Copy-Number Alterations  
456 from Whole-Genome Sequencing Data. *Curr Protoc Bioinformatics* **56**, 15.9.1-15.9.17 (2016).
- 457 11. BRASS. (<https://github.com/cancerit/BRASS>).
- 458 12. Rimmer, A. *et al.* Integrating mapping-, assembly- and haplotype-based approaches for  
459 calling variants in clinical sequencing applications. *Nat Genet* **46**, 912-8 (2014).
- 460 13. Rausch, T. *et al.* DELLY: structural variant discovery by integrated paired-end and split-  
461 read analysis. *Bioinformatics* **28**, i333-i339 (2012).
- 462 14. Cibulskis, K. *et al.* Sensitive detection of somatic point mutations in impure and  
463 heterogeneous cancer samples. *Nat Biotechnol* **31**, 213-9 (2013).
- 464 15. Fan, Y. *et al.* MuSE: accounting for tumor heterogeneity using a sample-specific error  
465 model improves sensitivity and specificity in mutation calling from sequencing data. *Genome Biol*  
466 **17**, 178 (2016).

- 467 16. Costello, M. *et al.* Discovery and characterization of artifactual mutations in deep coverage  
468 targeted capture sequencing data due to oxidative DNA damage during sample preparation.  
469 *Nucleic Acids Res* **41**, e67 (2013).
- 470 17. Wala, J., Zhang, C.Z., Meyerson, M. & Beroukhi, R. VariantBam: filtering and profiling  
471 of next-generation sequencing data using region-specific rules. *Bioinformatics* **32**, 2029-31  
472 (2016).
- 473 18. PCAWG-6. PCAWG-6 paper. (in preparation).
- 474 19. PCAWG-11. PCAWG-11 paper. (in preparation).
- 475 20. O'Connor, B.D., Merriman, B. & Nelson, S.F. SeqWare Query Engine: storing and  
476 searching sequence data in the cloud. *BMC Bioinformatics* **11 Suppl 12**, S2 (2010).
- 477 21. O'Connor, B.D. *et al.* The Dockstore: enabling modular, community-focused sharing of  
478 Docker-based genomics tools and workflows. *FI000Res* **6**, 52 (2017).
- 479 22. Amstutz, P. *et al.* Common Workflow Language, v1.0. *figshare* (2016).
- 480 23. Omberg, L. *et al.* Enabling transparent and collaborative computational analysis of 12  
481 tumor types within The Cancer Genome Atlas. *Nat Genet* **45**, 1121-6 (2013).
- 482 24. PCAWG-QC. Framework for quality assessment of whole genome, cancer sequences. (in  
483 preparation).

484

#### 485 **Additional Members of the PCAWG Technical Working Group**

486 Javier Bartolomé Rodríguez<sup>1</sup>, Keith A. Boroevich<sup>2</sup>, Rich Boyce<sup>3</sup>, Angela N. Brooks<sup>4</sup>, Alex  
487 Buchanan<sup>5</sup>, Ivo Buchhalter<sup>6,7</sup>, Niall J. Byrne<sup>8</sup>, Andy Cafferkey<sup>9</sup>, Peter J. Campbell<sup>10</sup>, Zhaohong  
488 Chen<sup>11</sup>, Sunghoon Cho<sup>12</sup>, Wan Choi<sup>13</sup>, Peter Clapham<sup>14</sup>, Francisco M. De La Vega<sup>15,16</sup>, Jonas  
489 Demeulemeester<sup>17,18</sup>, Michelle T. Dow<sup>19</sup>, Lewis J. Dursi<sup>8,20</sup>, Juergen Eils<sup>21</sup>, Claudiu Farcas<sup>22</sup>,  
490 Francesco Favero<sup>23</sup>, Nodirjon Fayzullaev<sup>8</sup>, Paul Flicek<sup>3</sup>, Nuno A. Fonseca<sup>3</sup>, Josep L.I. Gelpi<sup>24,25</sup>,  
491 Gad Getz<sup>26,27</sup>, Bob Gibson<sup>8</sup>, Michael C. Heinold<sup>7,6</sup>, Julian M. Hess<sup>26</sup>, Oliver Hofmann<sup>28</sup>, Jongwhi  
492 H. Hong<sup>29</sup>, Thomas J. Hudson<sup>30,31</sup>, Daniel Huebschmann<sup>6,7</sup>, Barbara Hutter<sup>32,33</sup>, Carolyn M.

493 Hutter<sup>34</sup>, Seiya Imoto<sup>35</sup>, Sinisa Ivkovic<sup>36</sup>, Seung-Hyup Jeon<sup>13</sup>, Wei Jiao<sup>8</sup>, Jongsun Jung<sup>37</sup>, Rolf  
494 Kabbe<sup>6</sup>, Andre Kahles<sup>38,39</sup>, Jules Kerssemakers<sup>40</sup>, Hyunghwan Kim<sup>13</sup>, Hyung-Lae Kim<sup>41,42</sup>,  
495 Jihoon Kim<sup>11</sup>, Jan O. Korbel<sup>43,3</sup>, Michael Koscher<sup>40</sup>, Antonios Koures<sup>11</sup>, Milena Kovacevic<sup>36</sup>,  
496 Chris Lawrenz<sup>6</sup>, Ignaty Leshchiner<sup>26</sup>, Dimitri G. Livitz<sup>26</sup>, George L. Mihaiescu<sup>8</sup>, Sanja  
497 Mijalkovic<sup>36</sup>, Ana Mijalkovic Lazic<sup>36</sup>, Satoru Miyano<sup>44</sup>, Hardeep K. Nahal<sup>8</sup>, Mia Nastic<sup>36</sup>,  
498 Jonathan Nicholson<sup>14</sup>, David Ocana<sup>3</sup>, Kazuhiro Ohi<sup>44</sup>, Lucila Ohno-Machado<sup>22</sup>, Larsson  
499 Omberg<sup>45</sup>, B.F. Francis Ouellette<sup>8,46</sup>, Nagarajan Paramasivam<sup>6,47</sup>, Marc D. Perry<sup>8</sup>, Todd D. Pihl<sup>48</sup>,  
500 Manuel Prinz<sup>6</sup>, Montserrat Puiggròs<sup>24</sup>, Petar Radovic<sup>36</sup>, Esther Rheinbay<sup>26,49</sup>, Mara W.  
501 Rosenberg<sup>26,49</sup>, Charles Short<sup>3</sup>, Heidi J. Sofia<sup>50</sup>, Jonathan Spring<sup>51</sup>, Adam J. Struck<sup>5</sup>, Grace  
502 Tiao<sup>26</sup>, Nebojsa Tijanic<sup>36</sup>, Peter Van Loo<sup>17,18</sup>, David Vicente<sup>1</sup>, Jeremiah A. Wala<sup>26,52</sup>, Zhining  
503 Wang<sup>53</sup>, Johannes Werner<sup>6</sup>, Ashley Williams<sup>11</sup>, Youngchoon Woo<sup>13</sup>, Adam J. Wright<sup>8</sup>, Qian  
504 Xiang<sup>8</sup>

505

506 <sup>1</sup>Department of Operations, Barcelona Supercomputing Center, Barcelona, Catalunya, 8034, Spain. <sup>2</sup>Laboratory for  
507 Medical Science Mathematics, RIKEN Center for Integrative Medical Sciences, Yokohama, Kanagawa, 230-0045,  
508 Japan. <sup>3</sup>European Molecular Biology Laboratory, European Bioinformatics Institute, Hinxton, Cambridge, CB10  
509 1SD, United Kingdom. <sup>4</sup>Biomolecular Engineering, University of California Santa Cruz, Santa Cruz, California,  
510 95065, USA. <sup>5</sup>Department of Computational Biology, Oregon Health and Science University, Portland, Oregon,  
511 97239, USA. <sup>6</sup>Division of Theoretical Bioinformatics, German Cancer Research Center (DKFZ), Heidelberg,  
512 Baden-Württemberg, 69120, Germany. <sup>7</sup>Department for Bioinformatics and Functional Genomics, Institute for  
513 Pharmacy and Molecular Biotechnology and BioQuant, Heidelberg University, Heidelberg, Baden-Württemberg,  
514 69120, Germany. <sup>8</sup>Informatics and Biocomputing Program, Ontario Institute for Cancer Research, Toronto, Ontario,  
515 M5G 0A3, Canada. <sup>9</sup>Technical Services Cluster, European Molecular Biology Laboratory, European Bioinformatics  
516 Institute, Hinxton, Cambridge, CB10 1SD, United Kingdom. <sup>10</sup>Cancer Genome Project, Wellcome Trust Sanger  
517 Institute, Hinxton, Cambridgeshire, CB10 1SA, United Kingdom <sup>11</sup>Department of Medicine, University of  
518 California San Diego, San Diego, California, 92093, USA. <sup>12</sup>PDXen Biosystems Inc., Seoul, 4900, South Korea.  
519 <sup>13</sup>Electronics and Telecommunications Research Institute, Daejeon, 34129, South Korea. <sup>14</sup>Informatics Support  
520 Group, Wellcome Trust Sanger Institute, Hinxton, Cambridgeshire, CB10 1SA, United Kingdom. <sup>15</sup>Department of  
521 Biomedical Data Science, Stanford University School of Medicine, Stanford, California, 94305, USA. <sup>16</sup>Annai  
522 Systems, Inc., Carlsbad, California, 92011, USA. <sup>17</sup>The Francis Crick Institute, London, NW1 1AT, United  
523 Kingdom. <sup>18</sup>Department of Human Genetics, University of Leuven, B-3000 Leuven, Belgium <sup>19</sup>Biomedical  
524 Informatics, University of California San Diego, San Diego, California, 92093, USA. <sup>20</sup>The Centre for  
525 Computational Medicine, The Hospital for Sick Children, Toronto, Ontario, M5G 0A4, Canada. <sup>21</sup>Theoretical  
526 Bioinformatics, German Cancer Research Center (DKFZ), Heidelberg, Baden-Württemberg, 69120, Germany.  
527 <sup>22</sup>Health System Department of Biomedical Informatics, University of California San Diego, La Jolla, California,  
528 92093, USA. <sup>23</sup>BRIC/Finsen Laboratory, Rigshospitalet, Copenhagen, 2200, Denmark. <sup>24</sup>Department of Life  
529 Sciences, Barcelona Supercomputing Center, Barcelona, Catalunya, 8034, Spain. <sup>25</sup>Department of Biochemistry and  
530 Molecular Biomedicine, University of Barcelona, Barcelona, Catalunya, 8028, Spain. <sup>26</sup>Cancer Program, Broad  
531 Institute of MIT and Harvard, Cambridge, Massachusetts, 02142, USA. <sup>27</sup>Cancer Center and Department of  
532 Pathology, Massachusetts General Hospital, Boston, Massachusetts, 02114, USA. <sup>28</sup>Center for Cancer Research,  
533 University of Melbourne, Melbourne, VIC 3001, Australia. <sup>29</sup>Genome Data Integration Center, Syntekabio Inc.,  
534 Daejeon, 34025, South Korea. <sup>30</sup>Genomics Program, Ontario Institute for Cancer Research, Toronto, Ontario, M5G  
535 0A3, Canada. <sup>31</sup>Oncology Discovery and Early Development, AbbVie, Redwood City, California, 94063, USA.  
536 <sup>32</sup>Division of Applied Bioinformatics, German Cancer Research Center (DKFZ), Heidelberg, Baden-Württemberg,  
537 69120, Germany. <sup>33</sup>Division of Applied Bioinformatics, National Center for Tumor Diseases, Heidelberg, Baden-  
538 Württemberg, 69120, Germany. <sup>34</sup>Division of Genomic Medicine, National Human Genome Research Institute,

539 Bethesda, Maryland, 20852, USA. <sup>35</sup>Health Intelligence Center, Institute of Medical Science, University of Tokyo,  
540 Tokyo, 108-8639, Japan. <sup>36</sup>Seven Bridges, Cambridge, Massachusetts, 02142, USA. <sup>37</sup>Genome Data Integration  
541 Center, Syntekabio Inc., Daejeon, 34025, South Korea <sup>38</sup>Department of Computer Science, ETH Zurich, Zurich,  
542 Zurich, 8092, Switzerland. <sup>39</sup>Computational Biology Center, Memorial Sloan Kettering Cancer Center, New York,  
543 New York, 10065, USA. <sup>40</sup>German Cancer Research Center (DKFZ), Heidelberg, Baden-Württemberg, 69120,  
544 Germany. <sup>41</sup>Department of Biochemistry, Ewha Womans University, Seoul, 07985, South Korea. <sup>42</sup>PGM21, Seoul,  
545 07985, South Korea. <sup>43</sup>Genome Biology Unit, European Molecular Biology Laboratory, Heidelberg, Baden-  
546 Württemberg, 69120, Germany. <sup>44</sup>Human Genome Center, Institute of Medical Science, University of Tokyo,  
547 Tokyo, 108-8639, Japan. <sup>45</sup>Systems Biology, Sage Bionetworks, Seattle, Washington, 98112, USA. <sup>46</sup>Department of  
548 Cell and Systems Biology, University of Toronto, Toronto, Ontario, M5S 3G5, Canada. <sup>47</sup>Medical Faculty  
549 Heidelberg, Heidelberg University, Heidelberg, Baden-Württemberg, 69120, Germany. <sup>48</sup>CSRA Incorporated,  
550 Fairfax, Virginia, 22042, USA. <sup>49</sup>Cancer Center, Massachusetts General Hospital, Boston, Massachusetts, 02114,  
551 USA. <sup>50</sup>National Human Genome Research Institute, National Institutes of Health, Bethesda, Maryland, 20892-  
552 9305, USA. <sup>51</sup>Center for Data Intensive Science, University of Chicago, Chicago, Illinois, 60637, USA.  
553 <sup>52</sup>Department of Cancer Biology, Dana-Farber Cancer Institute, Boston, Massachusetts, 02115, USA. <sup>53</sup>TCGA  
554 Program Office, National Cancer Institute, Bethesda, Maryland, 20892, USA.  
555

556 **Figures**

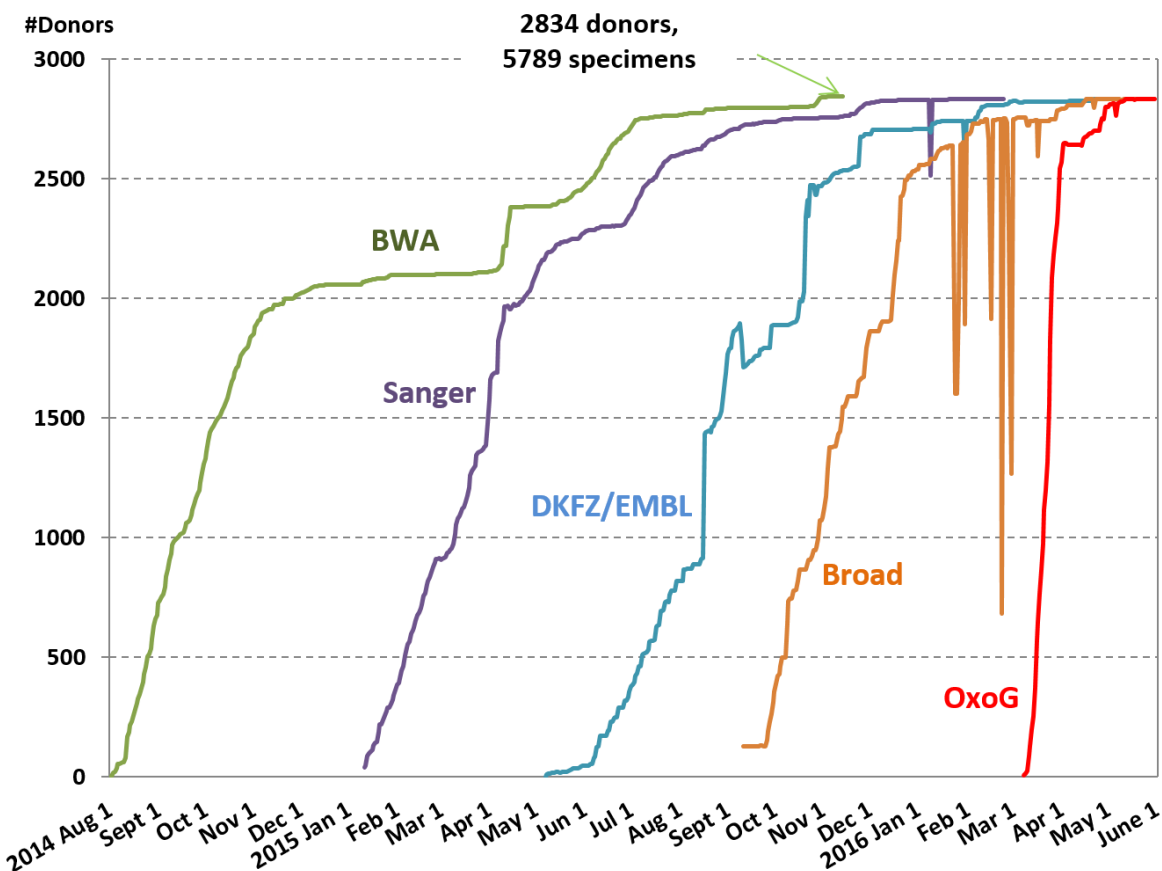

557  
558  
559 Figure 1: Progress of the 5 workflows over time. The “flat line” of the BWA workflow was due to  
560 two major tranches of sequencing data submissions, with a first tranche of ~2000 donors and a  
561 second tranche of ~800 donors that were uploaded later. The staggered start of the three  
562 variant calling pipelines was dictated more by the time required to develop and package the  
563 workflows, and less by the availability of compute power. The “dips” on the plots resulted from  
564 quality issues with some sets of variant calls that were withdrawn, reprocessed and resubmitted.  
565 In the case of the Broad workflow, the variant calls were withdrawn for post-processing before  
566 being considered complete. If all workflows and data would have been in place at the beginning  
567 of the project, we estimate the computation across the full set of 5,789 genomes could have  
568 been completed in under 6 months.



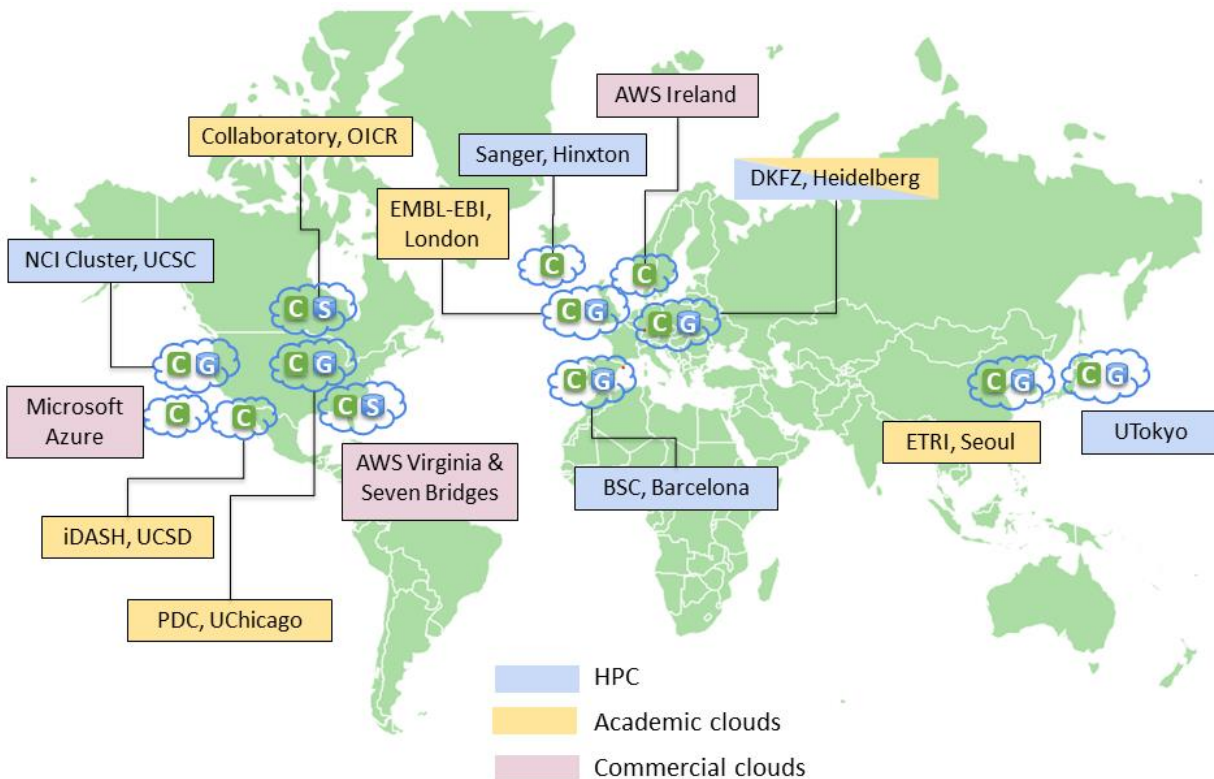

569

570 Figure 2: Geographical distribution of compute centers (C), GNOS servers (G), and

571 S3-compatible data storage (S).

572

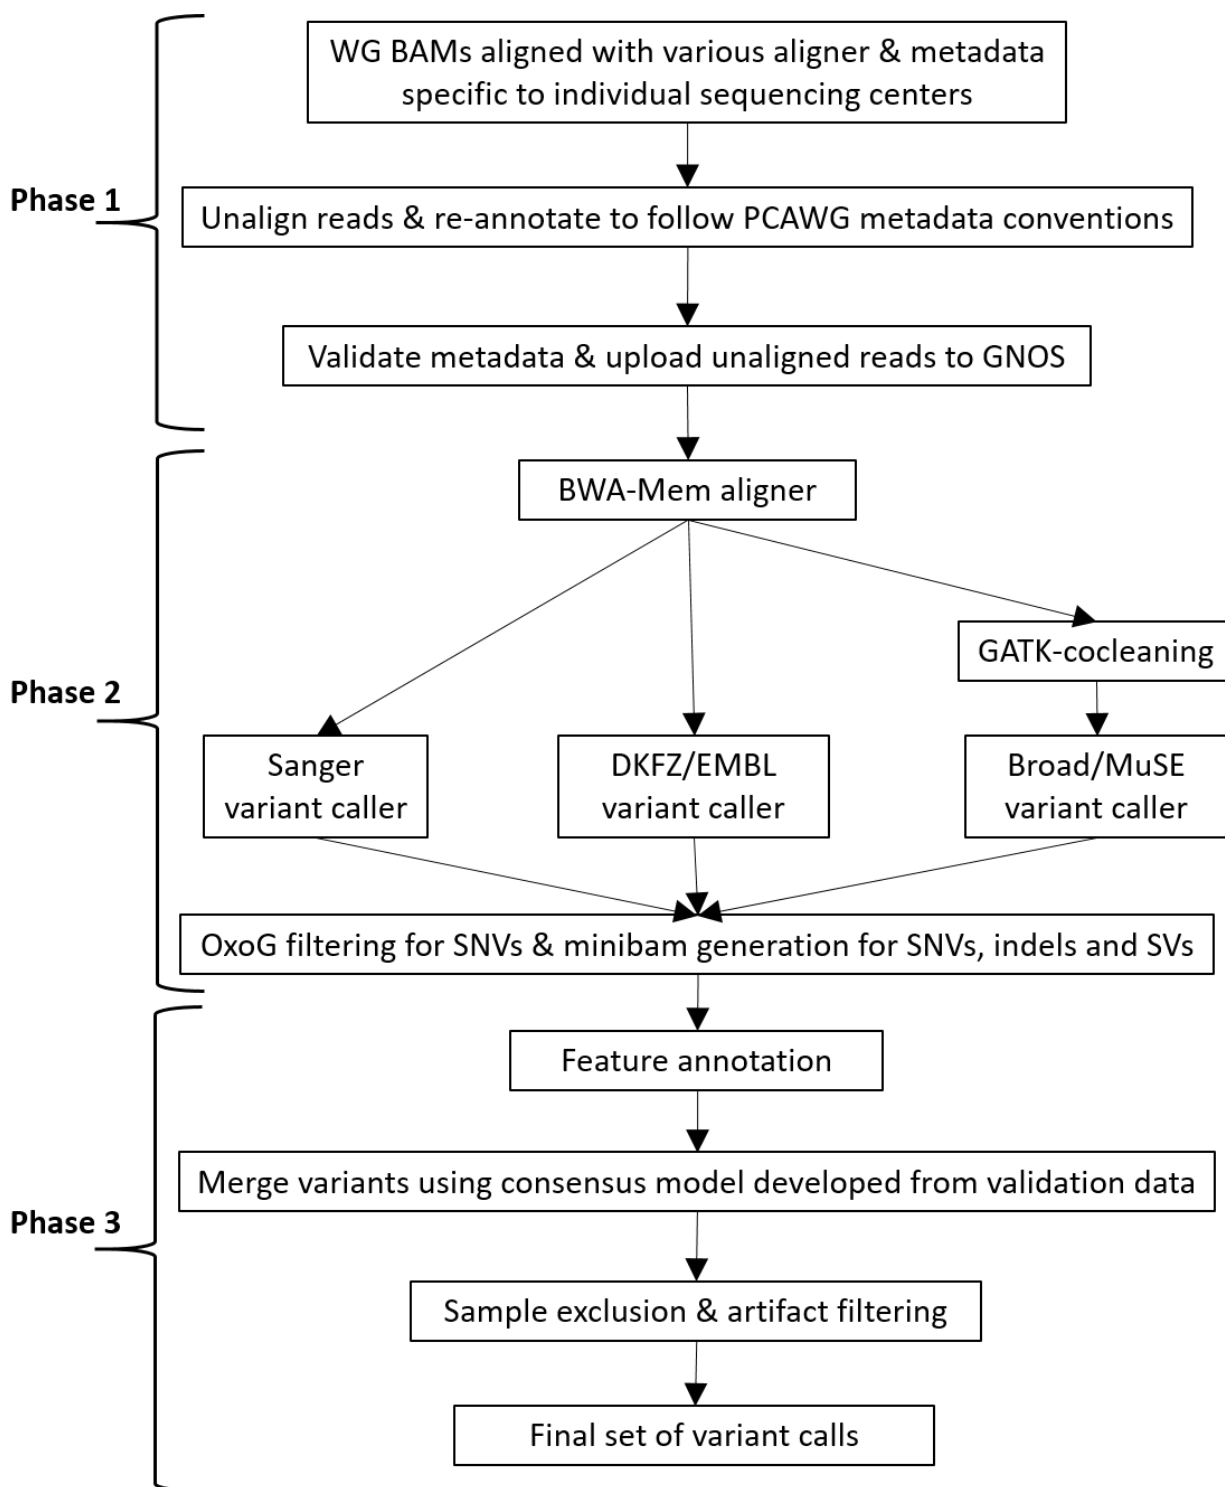

573  
574  
575  
576  
577  
578  
579

Figure 3: The uniform analysis of whole genomes involves three broad phases. Phase 1: Data marshalling and upload. Phase 2: Sequence alignment and variant calling. Phase 3: Variant merging and filtering. The algorithms for merging SNVs and indels are described in the PCAWG-1 paper, SVs in the PCAWG-6 paper, and CNVs in the PCAWG-11 paper.

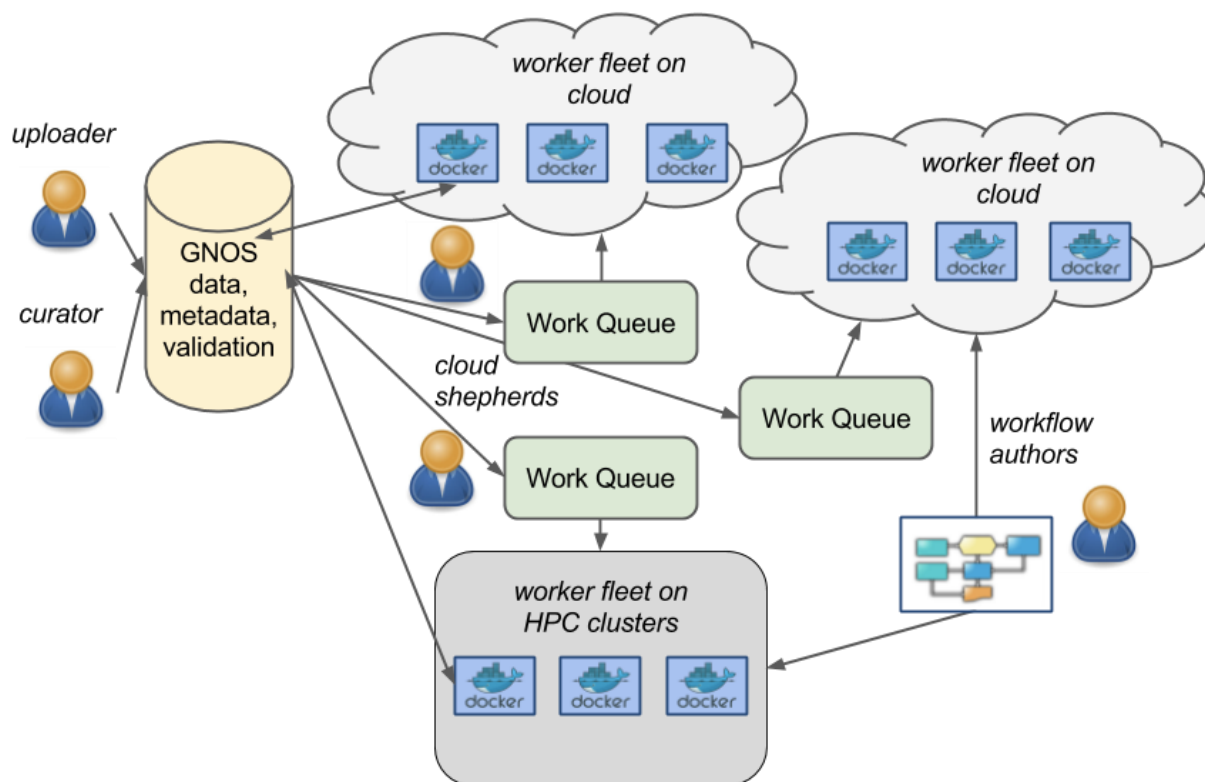

580  
581 Figure 4: Infrastructure used on cloud and HPC compute environments for core analysis.  
582

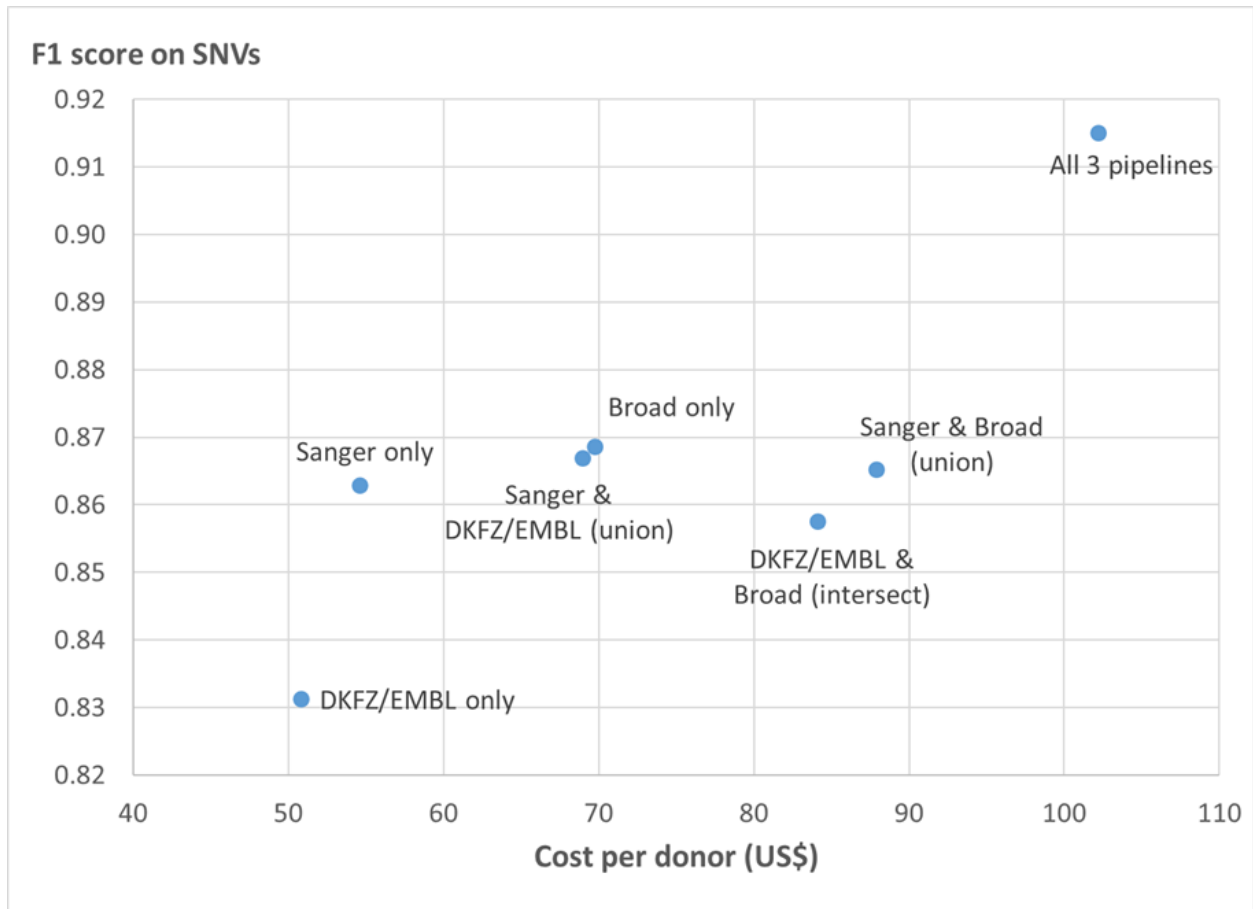

583  
584  
585  
586  
587  
588  
589  
590  
591

Figure 5: Costs for analyzing a tumor/normal pair through BWA-Mem, different combinations of variant calling pipelines, and OxoG filtering. The cost is calculated based on AWS instances at average spot pricing we experienced during the project, and includes egress costs to transfer the result files. PCAWG ran all 3 variant calling pipelines and achieved an F1 score of 0.9151 for SNVs. If running only one or two pipelines, there will be savings in cost but sacrifice in accuracy. Detailed cost analysis is shown in Suppl Table 3.

592 **Tables**

593

594 Table 1. Compute resources. \* Shared between environments. \*\* Transient storage used for  
595 local data processing.

596

|               | Type  | Allocated CPU/Cores | Allocated memory | Data Co-location Repository | Local Storage Amount |
|---------------|-------|---------------------|------------------|-----------------------------|----------------------|
| AWS           | Cloud | variable            | variable         | Y                           | 420TB                |
| Azure         | Cloud | variable            | variable         | N                           | -                    |
| BSC           | HPC   | 1000                | 7.75TB           | Y                           | 300TB                |
| Collaboratory | Cloud | 350                 | 3.2TB            | Y                           | 132TB                |
| DKFZ          | HPC   | 800                 | 3.5TB            | Y                           | 1.7PB*               |
| DKFZ          | Cloud | 1024                | 4TB              | Y                           | 1.7PB*               |
| EMBL-EBI      | Cloud | 1000                | 4TB              | Y                           | 1PB                  |
| ETRI          | Cloud | 800                 | 2TB              | Y                           | 750TB                |
| iDASH         | Cloud | 304                 | 2.8TB            | N                           | 9TB**                |
| PDC           | Cloud | 108                 | 324GB            | Y                           | 732TB                |
| Sanger        | HPC   | 1500                | 12TB             | N                           | 750TB**              |
| SBG           | Cloud | variable            | variable         | Y                           | -                    |
| UCSC          | HPC   | 4000                | 33TB             | Y                           | 300TB                |
| UTokyo        | HPC   | 2496                | 2.5TB            | Y                           | 400TB                |

597

598 Table 2. The five core workflows. Components for calling (1) SNVs, (2) indels, (3) SVs and (4)  
 599 SCNAs in each of the three variant calling workflows are listed. Because we utilized a large  
 600 number of compute environments with various configurations of cores and RAM, the average  
 601 runtime for each pipelines varied with large standard deviations (Suppl Fig. 7-10). The runtime  
 602 for the Broad pipeline included the 24 hours required to run GATK co-cleaning of BAMs. The  
 603 measured runtime included time to download input files, but not the time to upload result files.  
 604 (#) MuSE was developed at MD Anderson Cancer Center and Baylor College of Medicine.  
 605

|                                                 | <b>BWA</b>                                 | <b>Sanger</b>                                                                                 | <b>DKFZ/EMBL</b>                                                                             | <b>Broad</b>                                                                                                    | <b>OxoG</b>                        |
|-------------------------------------------------|--------------------------------------------|-----------------------------------------------------------------------------------------------|----------------------------------------------------------------------------------------------|-----------------------------------------------------------------------------------------------------------------|------------------------------------|
| Analytical components in workflow               | BWA-Mem<br>Picard<br>Biobambam<br>samtools | CaVEMan <sup>1</sup><br>cgpPindel <sup>2</sup><br>BRASS <sup>3</sup><br>ascatNgs <sup>4</sup> | dkfz_snv <sup>1</sup><br>Platypus <sup>2</sup><br>DELLY <sup>3</sup><br>ACE-seq <sup>4</sup> | GATK cocleaning<br>MuTect <sup>1</sup><br>MuSE <sup>1,#</sup><br>Snowman <sup>2,3</sup><br>dRanger <sup>3</sup> | OxoG<br>VariantBam                 |
| Workflow controller                             | SeqWare                                    | SeqWare                                                                                       | Roddy,<br>SeqWare                                                                            | Galaxy                                                                                                          | SeqWare                            |
| Recommended compute requirements                | 4 cores,<br>15GB RAM                       | 16 cores,<br>4.5GB<br>RAM/core                                                                | 16 cores,<br>64GB RAM                                                                        | 32 cores,<br>244GB RAM                                                                                          | 8 cores,<br>64GB RAM               |
| Average runtime across all compute environments | 2.0 +/- 1.7<br>days                        | 5.3 +/- 5.5<br>days                                                                           | 3.2 +/- 1.7<br>days                                                                          | 5.1 +/- 2.2<br>days                                                                                             | 2.6 +/- 1.3<br>hours               |
| Benchmark on AWS                                | 5.8 days on<br>4-core<br>m1.xlarge         | 2.2 days on<br>32-core<br>r3.8xlarge                                                          | 1.7 days on<br>32-core<br>r3.8xlarge                                                         | 3.7 days on<br>32-core r3.8xlarge                                                                               | 4 hours on<br>8-core<br>m2.4xlarge |
| Core hours per run                              | 557                                        | 1690                                                                                          | 1306                                                                                         | 2842                                                                                                            | 32                                 |
| Output files per run                            | 120GB                                      | 2 GB                                                                                          | 5 GB                                                                                         | 35 GB                                                                                                           | 1.5 GB                             |

606

607 **Supplementary Information**

608

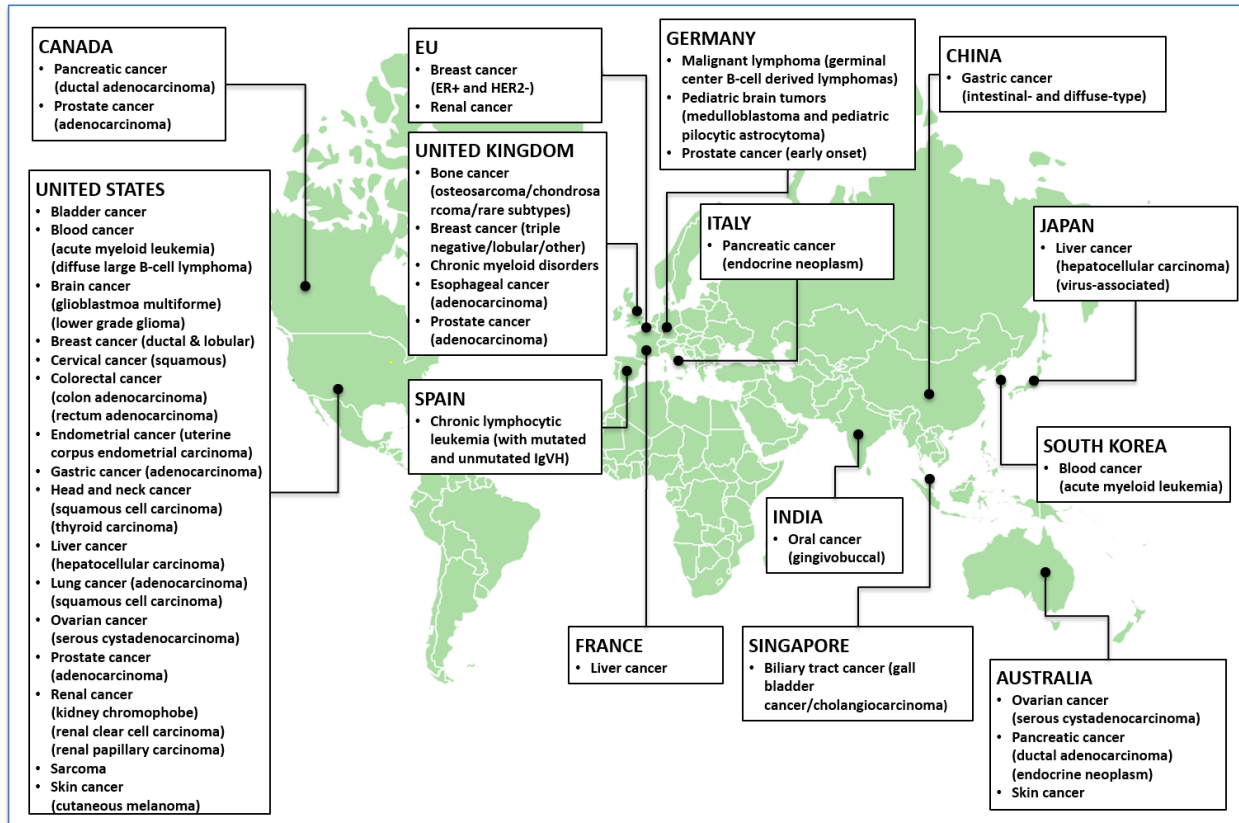

609

610

611 Supplementary Figure 1: Whole genomes from 2,834 donors across 39 cancer types were  
612 collected from 48 ICGC and TCGA projects in 14 jurisdictions.

613

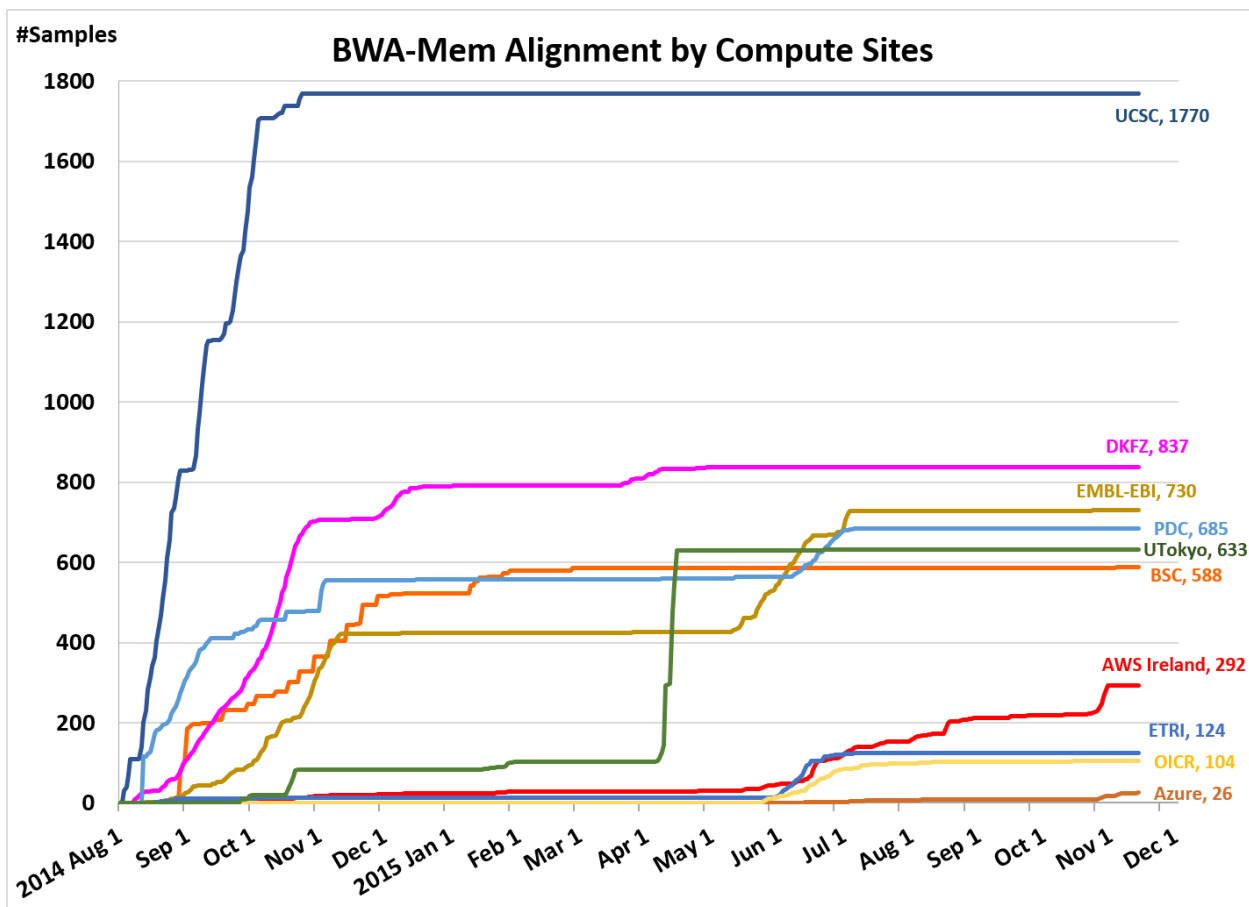

614  
615  
616

Supplementary Figure 2: Progress of BWA-Mem alignment over time at 7 compute sites.



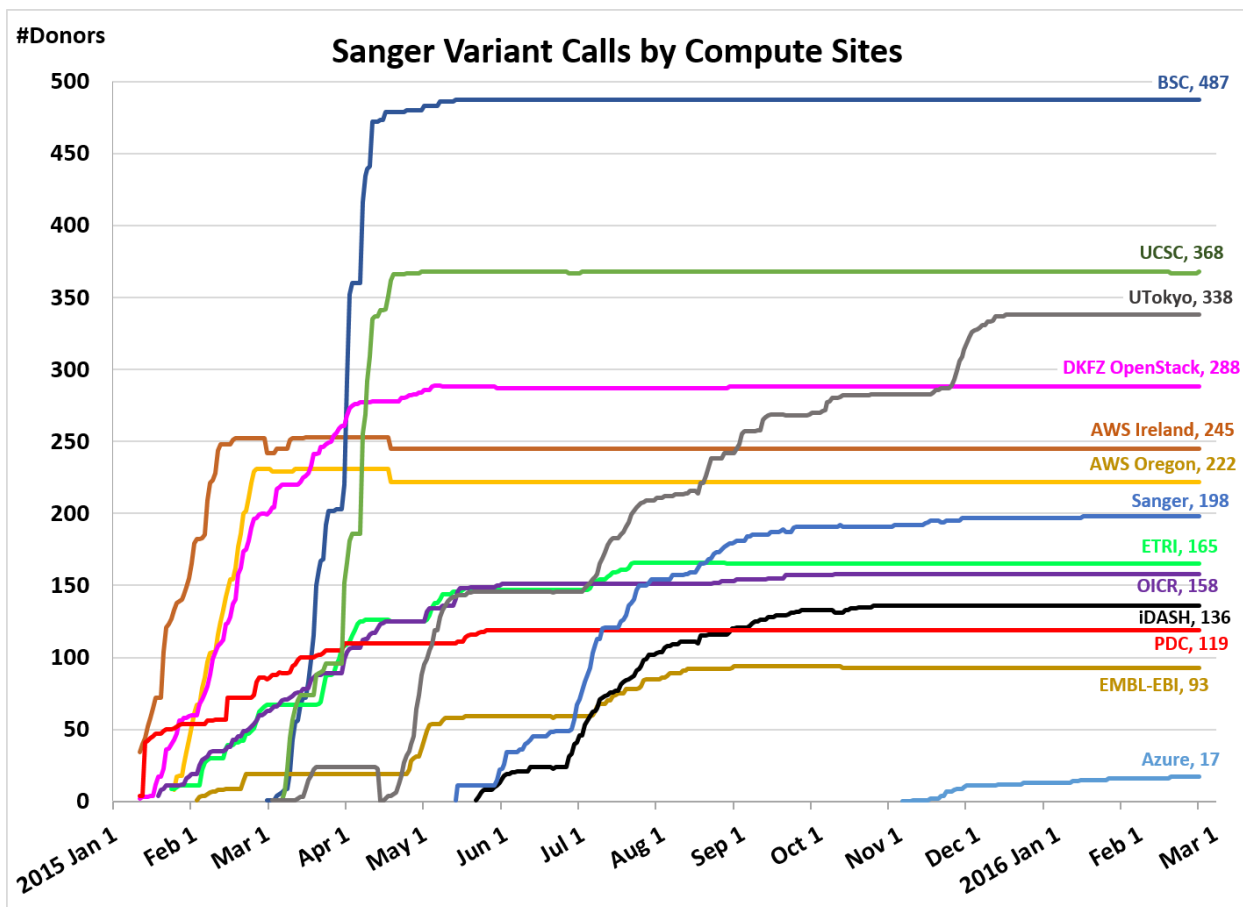

617  
618  
619  
620

Supplementary Figure 3: Progress of Sanger variant calling workflow over time at 13 compute sites.

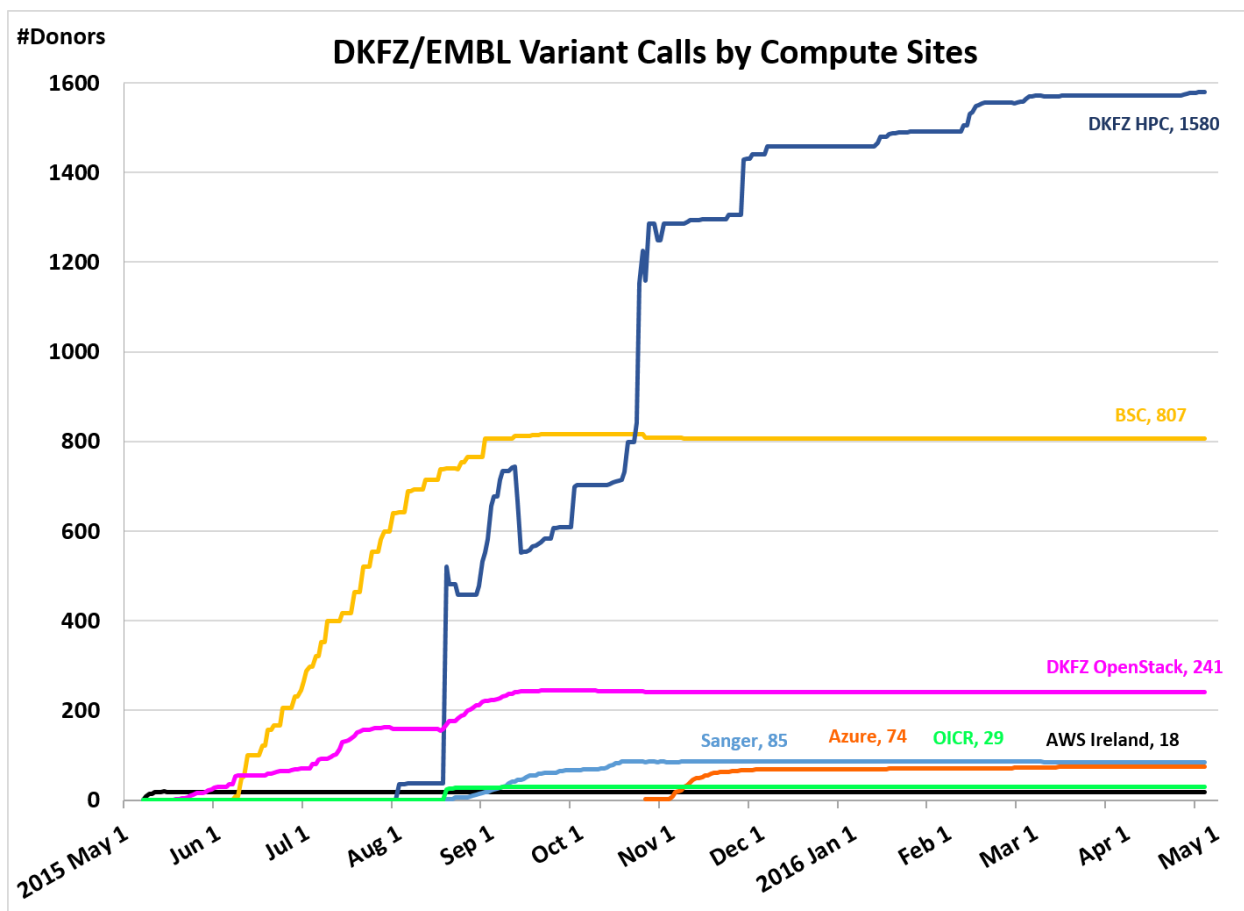

621  
622  
623  
624

Supplementary Figure 4: Progress of DKFZ/EMBL variant calling workflow over time at 7 compute sites.

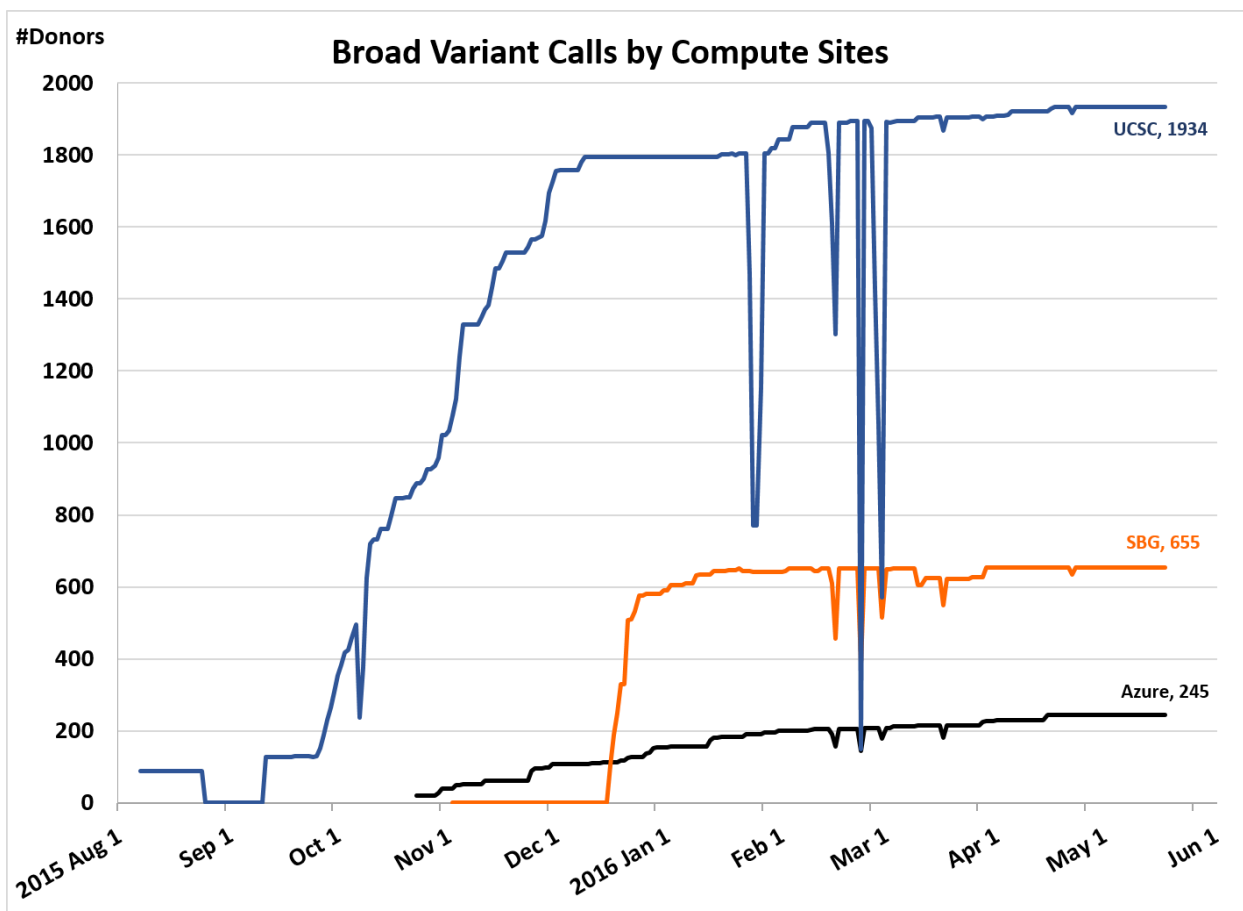

625  
626  
627  
628

Supplementary Figure 5: Progress of Broad variant calling workflow over time at 3 compute sites.

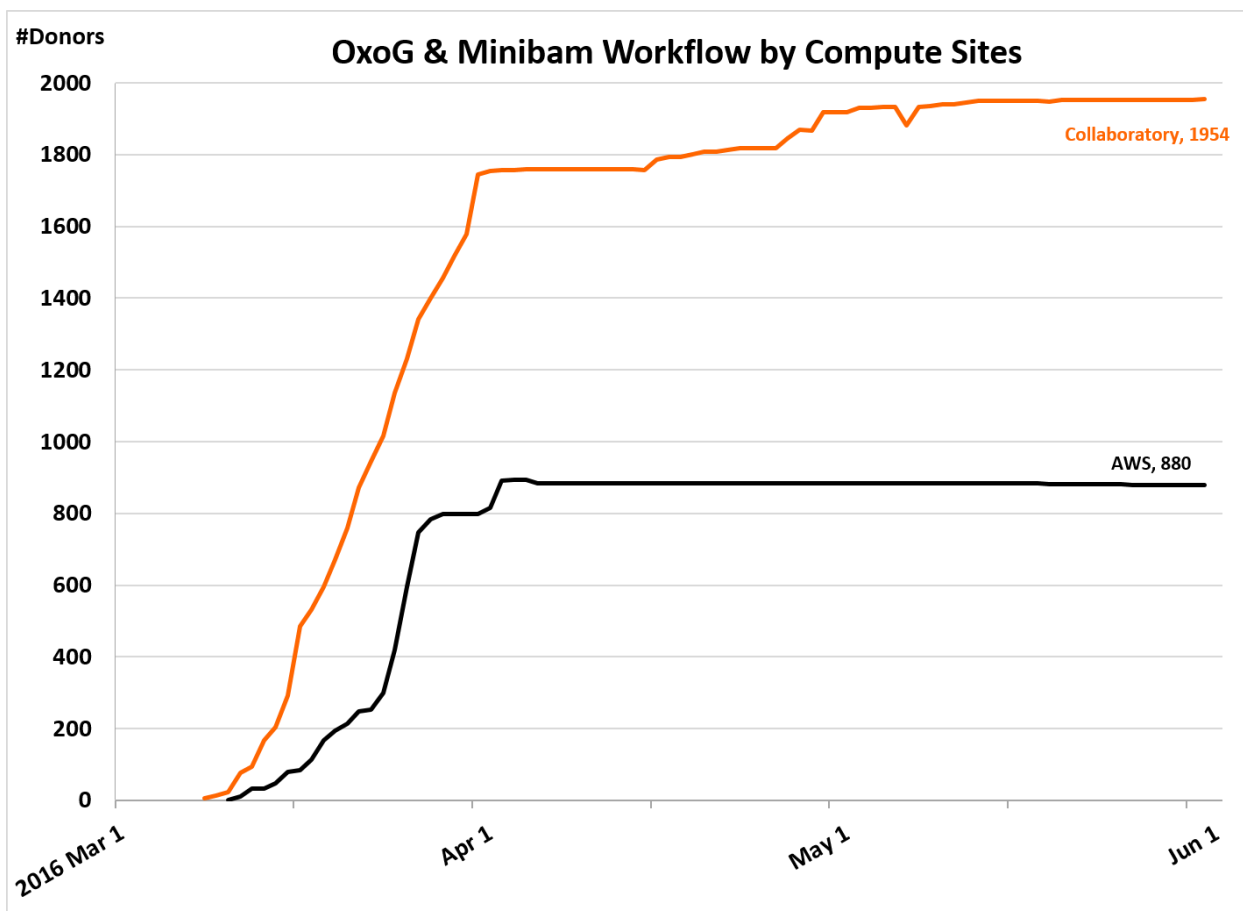

629  
630  
631

Supplementary Figure 6: Progress of OxoG and minibam workflow over time at 2 compute sites.

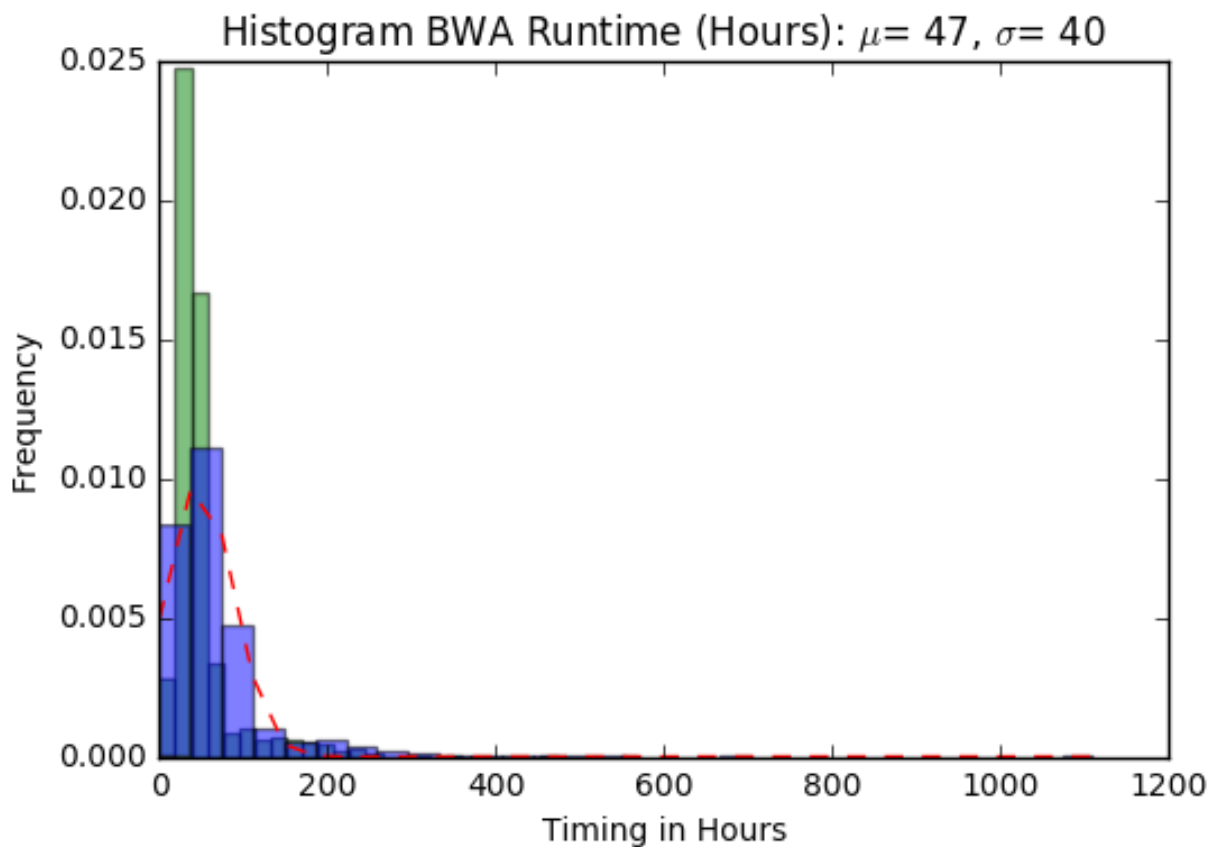

632  
633  
634

Supplementary Figure 7: Average runtimes for BWA-Mem alignment workflow

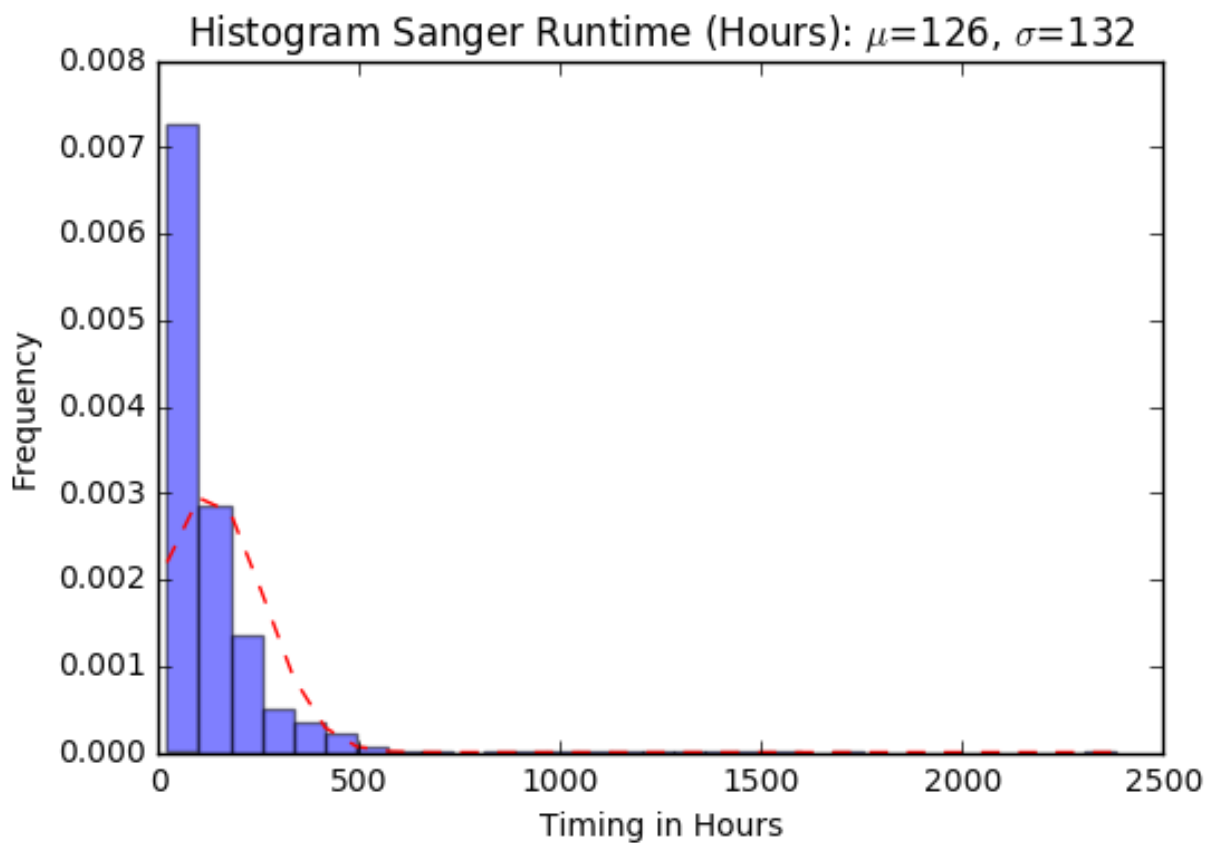

635  
636  
637

Supplementary Figure 8: Average runtime for the Sanger somatic variant calling workflow.

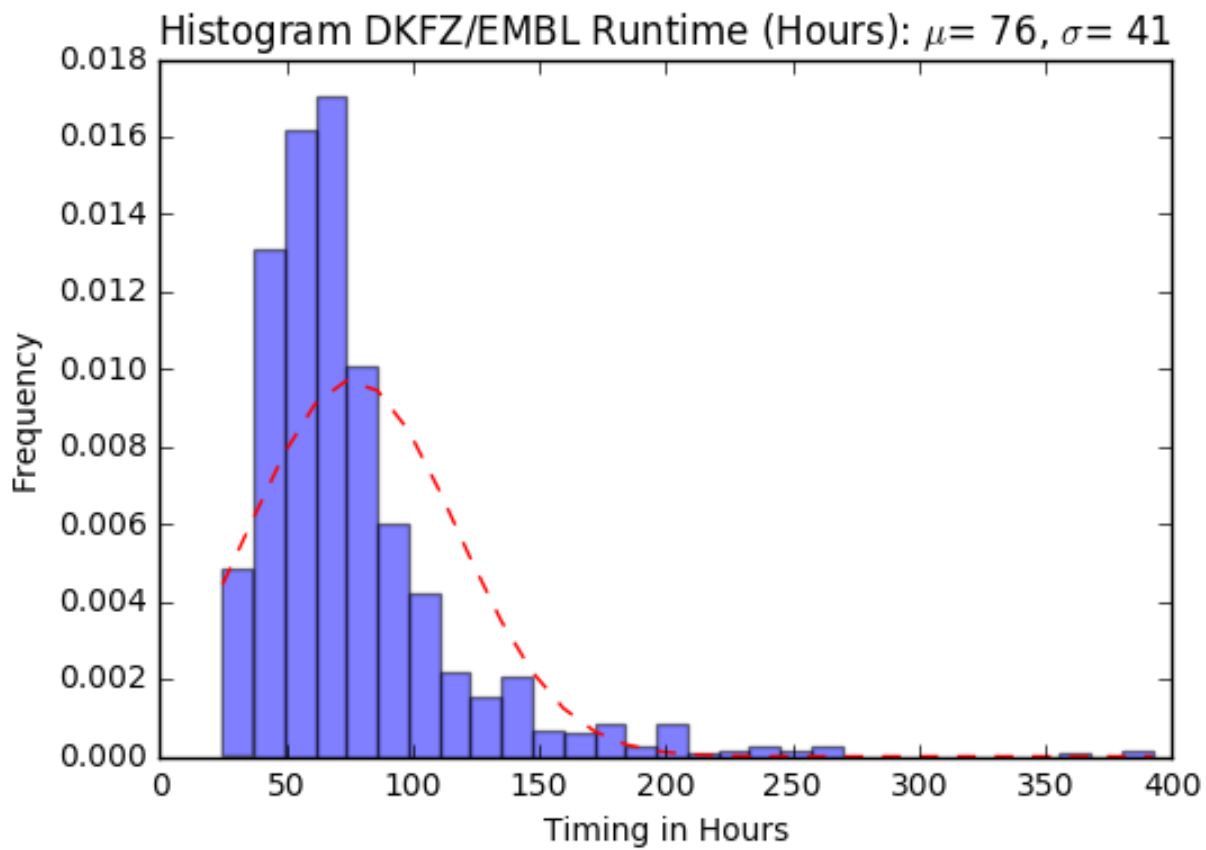

638  
639  
640

Supplementary Figure 9: Average runtime for the DKFZ/EMBL somatic variant calling workflow.

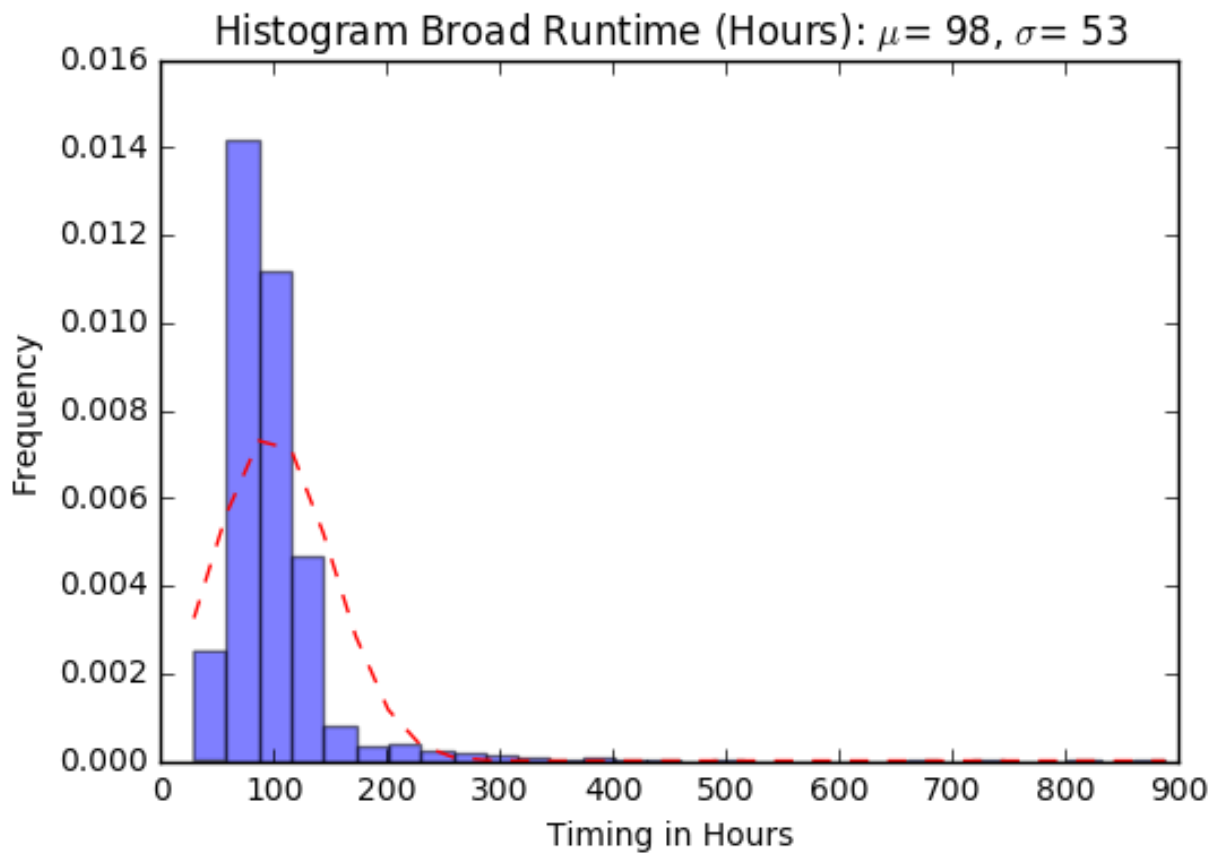

641  
642 Supplementary Figure 10: Average runtime for the Broad somatic variant calling workflow.  
643 Preceding the variant calling workflow, the GATK co-cleaning step takes an additional 24 hours.  
644



645 Supplementary Table 1. Percentage samples/donors run at each site for each pipeline  
646

|                         | <b>BWA</b> | <b>Sanger</b> | <b>DKFZ/EMBL</b> | <b>Broad/MuSE</b> | <b>OxoG</b> |
|-------------------------|------------|---------------|------------------|-------------------|-------------|
| <b>AWS Ireland</b>      | 5.0        | 16.4          | 0.6              |                   | 31.1        |
| <b>Azure</b>            | 0.4        | 0.6           | 2.6              | 8.6               |             |
| <b>BSC</b>              | 10.2       | 17.2          | 28.5             |                   |             |
| <b>Collaboratory</b>    |            |               |                  |                   | 68.9        |
| <b>DKFZ (HPC)</b>       |            |               | 55.8             |                   |             |
| <b>DKFZ (OpenStack)</b> | 14.5       | 10.2          | 8.5              |                   |             |
| <b>EMBL-EBI</b>         | 12.6       | 3.3           |                  |                   |             |
| <b>ETRI</b>             | 2.1        | 5.8           |                  |                   |             |
| <b>iDASH</b>            |            | 4.8           |                  |                   |             |
| <b>OICR</b>             | 1.8        | 5.6           | 1.0              |                   |             |
| <b>PDC</b>              | 11.8       | 4.2           |                  |                   |             |
| <b>Sanger</b>           |            | 7.0           | 3.0              |                   |             |
| <b>Seven Bridges</b>    |            |               |                  | 23.1              |             |
| <b>UCSC</b>             | 30.6       | 13.0          |                  | 68.2              |             |
| <b>UTokyo</b>           | 10.9       | 11.9          |                  |                   |             |

647

648 Supplementary Table 2. Data distribution as of May 2017. While ETRI GNOS and CGHub  
 649 served as data centres during the project, they have since been retired. Variant calls include  
 650 those from individual variant calling pipelines and the final consensus callsets. Long-term  
 651 repositories are denoted by asterisk (\*) and will increase their data holdings over time while  
 652 GNOS servers are gradually being retired. Latest information can be found at  
 653 <https://dcc.icgc.org/repositories>  
 654

| Data Repository    | ICGC Data                |                              |                          | TCGA Data                |                              |                          |
|--------------------|--------------------------|------------------------------|--------------------------|--------------------------|------------------------------|--------------------------|
|                    | % WG Alignments (534 TB) | % RNA-Seq Alignments (13 TB) | % Variant calls (520 GB) | % WG Alignments (240 TB) | % RNA-Seq Alignments (14 TB) | % Variant calls (228 GB) |
| BSC GNOS           | 100.0                    | 30.0                         | 0.3                      |                          |                              |                          |
| DKFZ GNOS          | 25.0                     |                              | 62.9                     |                          |                              |                          |
| EMBL-EBI GNOS      | 100.0                    | 59.3                         | 98.6                     |                          |                              |                          |
| UTokyo GNOS        | 54.6                     | 17.1                         | 1.6                      |                          |                              |                          |
| UChicago-ICGC GNOS | 16.8                     | 40.3                         | 28.7                     |                          |                              |                          |
| UChicago-TCGA GNOS |                          |                              |                          | 100.0                    | 100.0                        | 100.0                    |
| EGA*               | 97.8                     |                              |                          |                          |                              |                          |
| Collaboratory*     | 100.0                    | 100.0                        | 100.0                    |                          |                              |                          |
| AWS*               | 76.7                     | 80.1                         | 75.1                     |                          |                              |                          |
| Bionimbus PDC*     |                          |                              |                          | 100.0                    | 100.0                        | 0.2                      |

655

656 The following set of tables show how costs are calculated for Figure 5 which compares the  
657 costs and accuracies of running the different combination of variant calling pipelines.

658  
659 **Supplementary Table 3a.** The average run time for each workflow was rounded up to the  
660 nearest hour to reflect how AWS charges for EC2 instances that run for part of an hour. The  
661 size of the output files are noted as they contribute to either egress or storage costs.

| Workflow  | Average wall clock run time (hours) | Size of output files (GB) | AWS EC2 Instances Used |
|-----------|-------------------------------------|---------------------------|------------------------|
| BWA-Mem   | 140                                 | 134                       | m1.xlarge              |
| Sanger    | 53                                  | 2                         | r3.8xlarge             |
| DKFZ/EMBL | 41                                  | 5                         | r3.8xlarge             |
| Broad     | 89                                  | 35                        | r3.8xlarge             |
| OxoG      | 4                                   | 1.5                       | m2.4xlarge             |

662

663

664 **Supplementary Table 3b.** The project utilized EC2 spot instances in US East (N. Virginia), US  
665 West (Oregon), EU (Ireland) regions. Because spot pricing fluctuates, users should consult  
666 real-time information. The average spot pricing listed here was based on our own usage  
667 throughout the project.

| AWS EC2 Instances | vCPU | Mem (GiB) | Storage (GB) | Average spot pricing |
|-------------------|------|-----------|--------------|----------------------|
| m1.xlarge         | 4    | 15        | 4 x 420      | \$0.0426             |
| r3.8xlarge        | 32   | 244       | 2 x 320      | \$0.3382             |
| m2.4xlarge        | 8    | 68.4      | 2 x 840      | \$0.0834             |

668

669

670 **Supplementary Table 3c.** Cost calculations are based on the above spot pricing and an egress  
671 cost of \$0.09 per GB. The analysis time is made up of 3 steps: (1) running the BWA-Mem  
672 workflow on two separate instances to align simultaneously one tumor and one normal  
673 specimen; (2) running the variant calling workflows simultaneously with the longest running  
674 workflow dictating the run time of this step; (3) running the OxoG workflow after all variant  
675 calling workflows are completed. If analyzing 100 donors with all 3 variant calling pipelines, the  
676 analysis will involve running a fleet of 200, 300 and 100 EC2 instances, respectively in the 3  
677 steps. We have no other significant storage cost as the reference files amount to ~35GB  
678 costing under \$1/month in S3. An alternative to transferring the data out is to store the 312 GB  
679 of data for each donor in S3 for under \$8/month.

680

| <b>Variant Calling Pipelines</b> | <b>Total Cost</b> | <b>Compute Cost</b> | <b>Egress Cost</b> | <b>Analysis Time (days)</b> | <b>Median Sensitivity, Precision, F1</b>                                                                                                                           |
|----------------------------------|-------------------|---------------------|--------------------|-----------------------------|--------------------------------------------------------------------------------------------------------------------------------------------------------------------|
| All 3 pipelines                  | 102.19            | 7.15                | 28.04              | 9.7                         | 0.9047 +/- 0.03145<br>0.9348 +/- 0.03785<br>0.9151 +/- 0.02820                                                                                                     |
| Sanger only                      | 54.63             | 30.19               | 24.44              | 8.2                         | 0.8032 +/- 0.06515<br>0.9550 +/- 0.03855<br>0.8629 +/- 0.04795                                                                                                     |
| DKFZ/EMBL only                   | 50.84             | 26.13               | 24.71              | 7.7                         | 0.7565 +/- 0.0544<br>0.9352 +/- 0.0365<br>0.8313 +/- 0.05125                                                                                                       |
| Broad only                       | 69.77             | 42.36               | 27.41              | 9.7                         | 0.9095 +/- 0.01955<br>0.8386 +/- 0.06335<br>0.8687 +/- 0.04085                                                                                                     |
| Sanger & DKFZ/EMBL               | 68.94             | 44.05               | 24.89              | 8.2                         | <u>Union</u><br>0.8454 +/- 0.0572<br>0.9032 +/- 0.04405<br>0.8669 +/- 0.0509<br><u>Intersect</u><br>0.7228 +/- 0.05385<br>0.9954 +/- 0.00980<br>0.8216 +/- 0.04390 |
| Sanger & Broad                   | 87.88             | 60.29               | 27.59              | 9.7                         | <u>Union</u><br>0.9374 +/- 0.01935<br>0.8183 +/- 0.06395<br>0.8653 +/- 0.04220<br><u>Intersect</u><br>0.7856 +/- 0.0566<br>0.9913 +/- 0.0111<br>0.8632 +/- 0.03755 |
| DKFZ/EMBL & Broad                | 84.09             | 56.23               | 27.86              | 9.7                         | <u>Union</u><br>0.9339 +/- 0.01955<br>0.801 +/- 0.06505<br>0.8576 +/- 0.0429<br><u>Intersect</u><br>0.7384 +/- 0.05865<br>0.9939 +/- 0.0186<br>0.8315 +/- 0.0456   |

681

682 Supplementary Table 4. DOIs for PCAWG core analysis workflows  
 683

| <b>Workflow/Tool</b>      | <b>Dockstore</b>                                                                                                                                                        | <b>Latest DOI</b>                                                                         | <b>Version</b> | <b>Github</b>                                                                                                                         |
|---------------------------|-------------------------------------------------------------------------------------------------------------------------------------------------------------------------|-------------------------------------------------------------------------------------------|----------------|---------------------------------------------------------------------------------------------------------------------------------------|
| pcawg-bwa-mem-workflow    | <a href="https://dockstore.org/containers/quay.io/pancancer/pcawg-bwa-mem-workflow">https://dockstore.org/containers/quay.io/pancancer/pcawg-bwa-mem-workflow</a>       | <a href="https://doi.org/10.5281/zenodo.192377">https://doi.org/10.5281/zenodo.192377</a> | 2.6.8_1.2      | <a href="https://github.com/ICGC-TCGA-PanCancer/Seqware-BWA-Workflow">https://github.com/ICGC-TCGA-PanCancer/Seqware-BWA-Workflow</a> |
| pcawg-dkfst-workflow      | <a href="https://dockstore.org/containers/quay.io/pancancer/pcawg-dkfst-workflow">https://dockstore.org/containers/quay.io/pancancer/pcawg-dkfst-workflow</a>           | <a href="https://doi.org/10.5281/zenodo.192376">https://doi.org/10.5281/zenodo.192376</a> | 2.0.1_cwl1.0   | <a href="https://github.com/ICGC-TCGA-PanCancer/DEWrapperWorkflow">https://github.com/ICGC-TCGA-PanCancer/DEWrapperWorkflow</a>       |
| pcawg-sanger-cgp-workflow | <a href="https://dockstore.org/containers/quay.io/pancancer/pcawg-sanger-cgp-workflow">https://dockstore.org/containers/quay.io/pancancer/pcawg-sanger-cgp-workflow</a> | <a href="https://doi.org/10.5281/zenodo.192162">https://doi.org/10.5281/zenodo.192162</a> | 2.0.3          | <a href="https://github.com/ICGC-TCGA-PanCancer/CGP-Somatic-Docker">https://github.com/ICGC-TCGA-PanCancer/CGP-Somatic-Docker</a>     |
| pcawg_delly_workflow      | <a href="https://dockstore.org/containers/quay.io/pancancer/pcawg_delly_workflow">https://dockstore.org/containers/quay.io/pancancer/pcawg_delly_workflow</a>           | <a href="https://doi.org/10.5281/zenodo.192166">https://doi.org/10.5281/zenodo.192166</a> | 2.0.1-cwl1.0   | <a href="https://github.com/ICGC-TCGA-PanCancer/DEWrapperWorkflow">https://github.com/ICGC-TCGA-PanCancer/DEWrapperWorkflow</a>       |
| broad                     |                                                                                                                                                                         |                                                                                           |                |                                                                                                                                       |
| oxog                      |                                                                                                                                                                         |                                                                                           |                |                                                                                                                                       |

684
